# Supplementary material for: A twin UGUA motif directs the balance between gene isoforms through CFIm and the mTORC1 signaling pathway
Source: eLife journal article supplement (doi:10.7554/elife.85036), 2023-08-17
Supplement: fig6-data1 [file elife-85036-fig6-data1-v1.zip]

Fig. 6D-source data

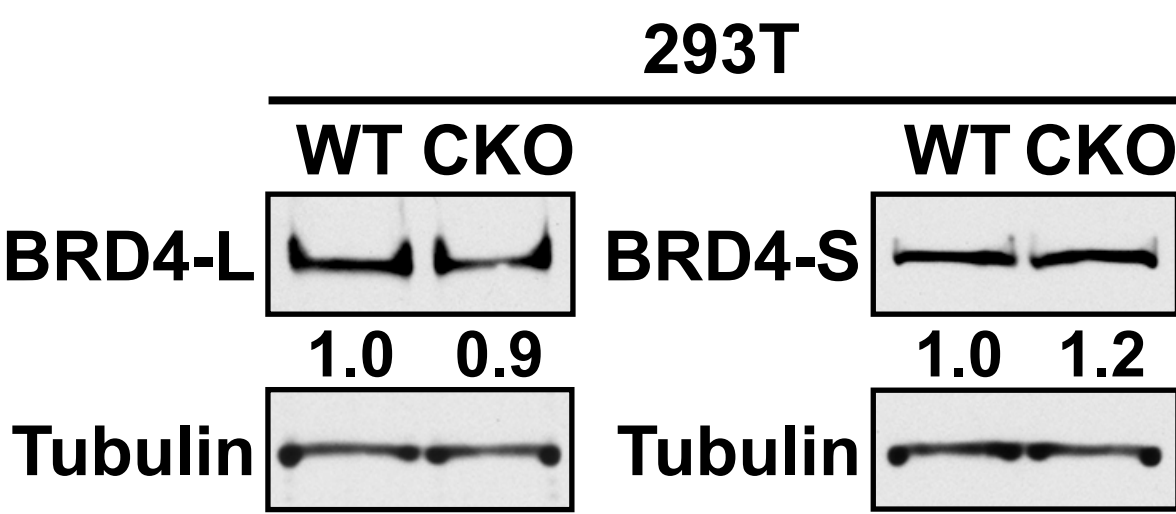

Figure panel

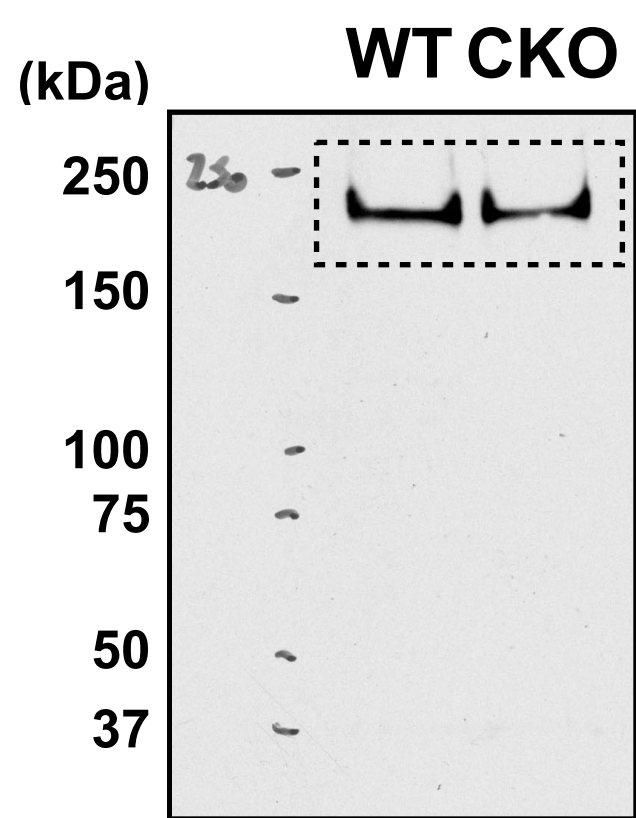

WB: BRD4-L

Source data 2

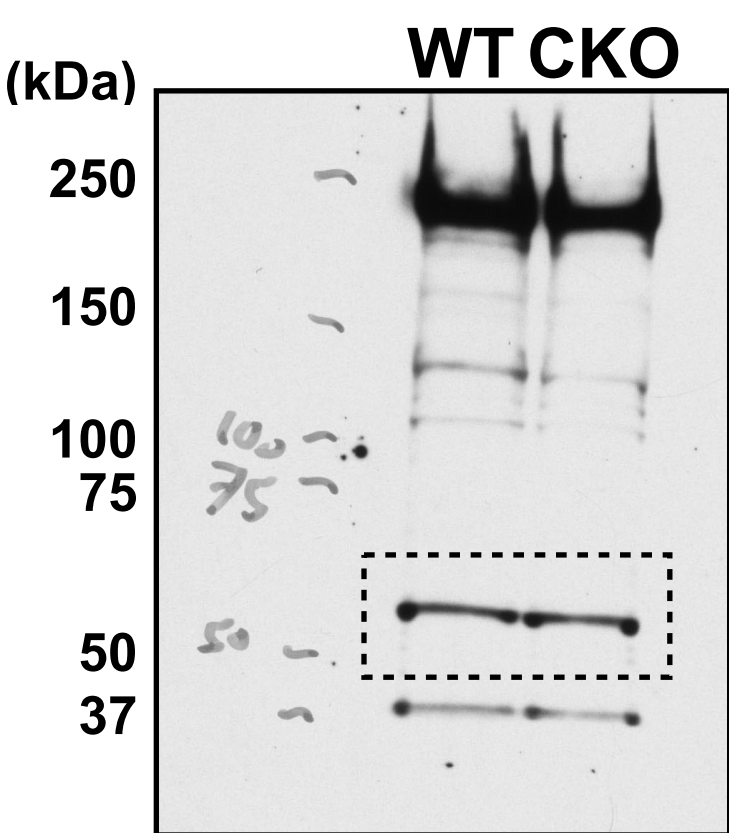

WB: Tubulin (re-blot)

Source data 3

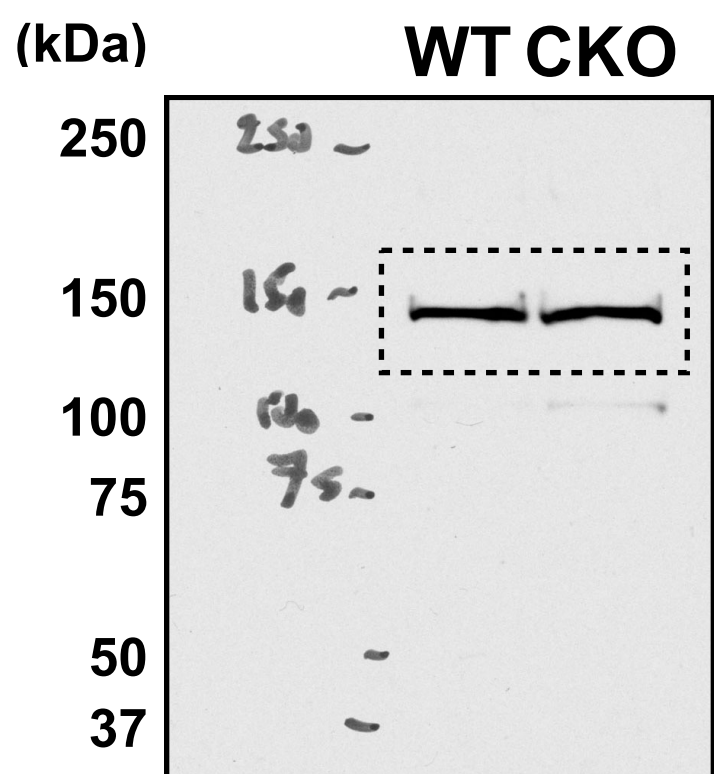

WB: BRD4-S

Source data 4

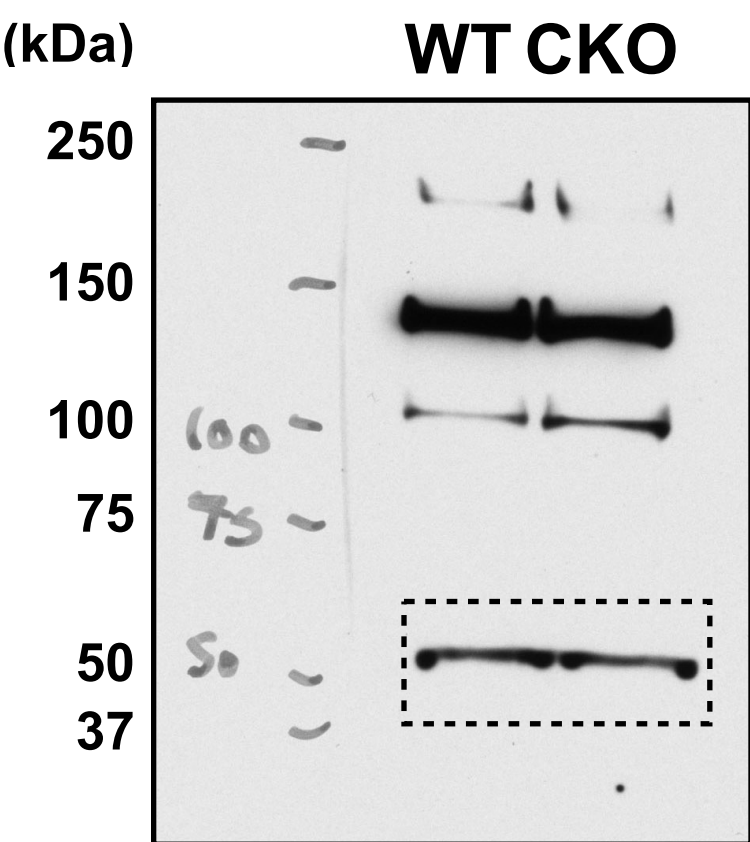

WB: Tubulin (re-blot)

Source data 5
