# Supplementary material for: A twin UGUA motif directs the balance between gene isoforms through CFIm and the mTORC1 signaling pathway
Source: eLife. 2023 Sep 4;12:e85036. doi: 10.7554/eLife.85036 (PMC10476966; doi:10.7554/eLife.85036)
Supplement: Supplementary file 1. [file elife-85036-supp1.xlsx]

## Sheet: ReadMe
Table S1. Gene lists
Table	Experiment	Description
S1A	cTag-PAPERCLIP in Tsc1-WT/KO mice	30 genes, proximal shift
S1B	cTag-PAPERCLIP in Tsc1-WT/KO mice	105 genes, distal shift
S1C	cTag-PAPERCLIP in Tsc1-WT/KO mice	6 genes, proximal switch
S1D	cTag-PAPERCLIP in Tsc1-WT/KO mice	14 genes, distal switch

## Sheet: TableS1A
ensembl_gene_id	mgi_symbol
ENSMUSG00000003039	Fam32a
ENSMUSG00000005161	Prdx2
ENSMUSG00000006057	Atp5g1
ENSMUSG00000007617	Homer1
ENSMUSG00000012405	Rpl15
ENSMUSG00000017286	Glod4
ENSMUSG00000017781	Pitpna
ENSMUSG00000018800	Abca5
ENSMUSG00000020015	Cdk17
ENSMUSG00000021482	Aaed1
ENSMUSG00000021750	Fam107a
ENSMUSG00000024319	Vps52
ENSMUSG00000025764	Jade1
ENSMUSG00000028121	Bcar3
ENSMUSG00000031156	Slc35a2
ENSMUSG00000031791	Tmem38a
ENSMUSG00000032599	Ip6k2
ENSMUSG00000033760	Rbm4b
ENSMUSG00000036760	Kcnk9
ENSMUSG00000037251	Pomk
ENSMUSG00000037300	Ttc13
ENSMUSG00000038026	Kcnj9
ENSMUSG00000048911	Rnf24
ENSMUSG00000052915	Msl1
ENSMUSG00000059149	Mfsd4a
ENSMUSG00000060336	Zfp937
ENSMUSG00000064043	Trerf1
ENSMUSG00000072494	Ppp1r3e
ENSMUSG00000079700	Fpr3
ENSMUSG00000092492	B230208B08Rik

## Sheet: TableS1B
ensembl_gene_id	mgi_symbol
ENSMUSG00000000605	Clcn4
ENSMUSG00000000787	Ddx3x
ENSMUSG00000002103	Acp2
ENSMUSG00000005580	Adcy9
ENSMUSG00000006304	Arpc2
ENSMUSG00000007097	Atp1a2
ENSMUSG00000010609	Psen2
ENSMUSG00000014932	Yes1
ENSMUSG00000015002	Efr3a
ENSMUSG00000018593	Sparc
ENSMUSG00000019188	H13
ENSMUSG00000019505	Ubb
ENSMUSG00000020044	Timp3
ENSMUSG00000020362	Cnot6
ENSMUSG00000020593	Lpin1
ENSMUSG00000020790	Ankfy1
ENSMUSG00000020923	Ubtf
ENSMUSG00000021071	Trim9
ENSMUSG00000021219	Rgs6
ENSMUSG00000021474	Sfxn1
ENSMUSG00000021597	Slf1
ENSMUSG00000021756	Il6st
ENSMUSG00000022003	Slc25a30
ENSMUSG00000022526	Zfp251
ENSMUSG00000022679	Mpv17l
ENSMUSG00000022684	Bfar
ENSMUSG00000022861	Dgkg
ENSMUSG00000023021	Cers5
ENSMUSG00000023110	Prmt5
ENSMUSG00000023977	Ubr2
ENSMUSG00000024084	Qpct
ENSMUSG00000024109	Nrxn1
ENSMUSG00000024261	Syt4
ENSMUSG00000024420	Zfp521
ENSMUSG00000024501	Dpysl3
ENSMUSG00000025917	Cops5
ENSMUSG00000025925	Terf1
ENSMUSG00000026018	Ica1l
ENSMUSG00000026442	Nfasc
ENSMUSG00000026623	Lpgat1
ENSMUSG00000026833	Olfm1
ENSMUSG00000026932	Nacc2
ENSMUSG00000026933	Camsap1
ENSMUSG00000027956	Tmem144
ENSMUSG00000028434	Epb41l4b
ENSMUSG00000028926	Cdk14
ENSMUSG00000029199	Lias
ENSMUSG00000030291	Med21
ENSMUSG00000030302	Atp2b2
ENSMUSG00000030722	Nfatc2ip
ENSMUSG00000031381	Piga
ENSMUSG00000031808	Slc27a1
ENSMUSG00000031860	Pbx4
ENSMUSG00000032224	Fam81a
ENSMUSG00000032773	Chrm1
ENSMUSG00000034744	Nagk
ENSMUSG00000034781	Gna11
ENSMUSG00000035964	Tmem59l
ENSMUSG00000037235	Mxd4
ENSMUSG00000037486	Asxl2
ENSMUSG00000037935	Smarce1
ENSMUSG00000038028	Tigar
ENSMUSG00000038764	Ptpn3
ENSMUSG00000039145	Camk1d
ENSMUSG00000040430	Pitpnc1
ENSMUSG00000040721	Zfhx2
ENSMUSG00000040888	Gfer
ENSMUSG00000042046	Dstyk
ENSMUSG00000042203	Tbc1d22b
ENSMUSG00000042323	Pbrm1
ENSMUSG00000042680	Garem1
ENSMUSG00000043419	Rnf227
ENSMUSG00000045036	Tmem232
ENSMUSG00000046378	Asphd1
ENSMUSG00000046404	Yod1
ENSMUSG00000046668	Cxxc5
ENSMUSG00000047409	Ctdspl
ENSMUSG00000047495	Dlgap2
ENSMUSG00000047789	Slc38a9
ENSMUSG00000047976	Kcna1
ENSMUSG00000052889	Prkcb
ENSMUSG00000053907	Mat2a
ENSMUSG00000055067	Smyd3
ENSMUSG00000055553	Kxd1
ENSMUSG00000056429	Tgoln1
ENSMUSG00000057182	Scn3a
ENSMUSG00000058740	Kcnt1
ENSMUSG00000059921	Unc5c
ENSMUSG00000060073	Psma3
ENSMUSG00000060373	Hnrnpc
ENSMUSG00000062580	Timm17a
ENSMUSG00000063455	D630045J12Rik
ENSMUSG00000063568	Jazf1
ENSMUSG00000063919	Srrm4
ENSMUSG00000064115	Cadm2
ENSMUSG00000066324	Impad1
ENSMUSG00000066687	Zbtb16
ENSMUSG00000070476	Fam217b
ENSMUSG00000071533	Pcnp
ENSMUSG00000073664	Nbeal1
ENSMUSG00000075318	Scn2a
ENSMUSG00000092083	Kcnb2
ENSMUSG00000092260	Zfp963
ENSMUSG00000097789	Gm2115
ENSMUSG00000102976	Zc3h11a

## Sheet: TableS1C
ensembl_gene_id	mgi_symbol
ENSMUSG00000005161	Prdx2
ENSMUSG00000012405	Rpl15
ENSMUSG00000021482	Aaed1
ENSMUSG00000033760	Rbm4b
ENSMUSG00000079700	Fpr3
ENSMUSG00000092492	B230208B08Rik

## Sheet: TableS1D
ensembl_gene_id	mgi_symbol
ENSMUSG00000007097	Atp1a2
ENSMUSG00000020790	Ankfy1
ENSMUSG00000021071	Trim9
ENSMUSG00000030302	Atp2b2
ENSMUSG00000031808	Slc27a1
ENSMUSG00000038764	Ptpn3
ENSMUSG00000040721	Zfhx2
ENSMUSG00000045036	Tmem232
ENSMUSG00000046378	Asphd1
ENSMUSG00000058740	Kcnt1
ENSMUSG00000071533	Pcnp
ENSMUSG00000092260	Zfp963
ENSMUSG00000097789	Gm2115
ENSMUSG00000102976	Zc3h11a
