# Supplementary material for: A twin UGUA motif directs the balance between gene isoforms through CFIm and the mTORC1 signaling pathway
Source: eLife. 2023 Sep 4;12:e85036. doi: 10.7554/eLife.85036 (PMC10476966; doi:10.7554/eLife.85036)
Supplement: Supplementary file 2. [file elife-85036-supp2.xlsx]

## Sheet: ReadMe
Table S2. Gene lists
Table	Experiment	Description
S2A	PAPERCLIP in shCPSF6-BE2C cells	2039 genes, proximal shift
S2B	PAPERCLIP in shCPSF6-BE2C cells	156 genes, distal shift
S2C	PAPERCLIP in shCPSF6-BE2C cells	633 genes, proximal switch
S2D	PAPERCLIP in shCPSF6-BE2C cells	35 genes, distal switch

## Sheet: TableS2A
ensembl_gene_id	external_gene_name
ENSG00000000003	TSPAN6
ENSG00000001084	GCLC
ENSG00000001461	NIPAL3
ENSG00000001630	CYP51A1
ENSG00000003509	NDUFAF7
ENSG00000003989	SLC7A2
ENSG00000004455	AK2
ENSG00000004961	HCCS
ENSG00000005108	THSD7A
ENSG00000005175	RPAP3
ENSG00000005249	PRKAR2B
ENSG00000005339	CREBBP
ENSG00000005700	IBTK
ENSG00000005889	ZFX
ENSG00000006125	AP2B1
ENSG00000006459	KDM7A
ENSG00000006468	ETV1
ENSG00000006634	DBF4
ENSG00000006652	IFRD1
ENSG00000006715	VPS41
ENSG00000007168	PAFAH1B1
ENSG00000008083	JARID2
ENSG00000008196	TFAP2B
ENSG00000008256	CYTH3
ENSG00000008277	ADAM22
ENSG00000008282	SYPL1
ENSG00000008294	SPAG9
ENSG00000008710	PKD1
ENSG00000008853	RHOBTB2
ENSG00000008952	SEC62
ENSG00000010017	RANBP9
ENSG00000010244	ZNF207
ENSG00000010270	STARD3NL
ENSG00000010322	NISCH
ENSG00000011007	ELOA
ENSG00000011105	TSPAN9
ENSG00000011114	BTBD7
ENSG00000011258	MBTD1
ENSG00000011275	RNF216
ENSG00000011405	PIK3C2A
ENSG00000011426	ANLN
ENSG00000011465	DCN
ENSG00000012174	MBTPS2
ENSG00000012660	ELOVL5
ENSG00000012963	UBR7
ENSG00000013293	SLC7A14
ENSG00000013375	PGM3
ENSG00000013561	RNF14
ENSG00000014123	UFL1
ENSG00000015133	CCDC88C
ENSG00000015153	YAF2
ENSG00000015171	ZMYND11
ENSG00000016082	ISL1
ENSG00000016864	GLT8D1
ENSG00000017260	ATP2C1
ENSG00000021574	SPAST
ENSG00000021776	AQR
ENSG00000023171	GRAMD1B
ENSG00000023228	NDUFS1
ENSG00000023318	ERP44
ENSG00000023516	AKAP11
ENSG00000025039	RRAGD
ENSG00000025770	NCAPH2
ENSG00000025796	SEC63
ENSG00000028839	TBPL1
ENSG00000029363	BCLAF1
ENSG00000030066	NUP160
ENSG00000031003	FAM13B
ENSG00000033030	ZCCHC8
ENSG00000033800	PIAS1
ENSG00000033867	SLC4A7
ENSG00000034053	APBA2
ENSG00000034713	GABARAPL2
ENSG00000035141	FAM136A
ENSG00000035499	DEPDC1B
ENSG00000035862	TIMP2
ENSG00000036257	CUL3
ENSG00000036549	ZZZ3
ENSG00000037474	NSUN2
ENSG00000037637	FBXO42
ENSG00000038002	AGA
ENSG00000038210	PI4K2B
ENSG00000038219	BOD1L1
ENSG00000038274	MAT2B
ENSG00000038382	TRIO
ENSG00000039123	MTREX
ENSG00000040933	INPP4A
ENSG00000042088	TDP1
ENSG00000042429	MED17
ENSG00000044574	HSPA5
ENSG00000047188	YTHDC2
ENSG00000047230	CTPS2
ENSG00000047346	FAM214A
ENSG00000047578	KIAA0556
ENSG00000047621	C12orf4
ENSG00000048649	RSF1
ENSG00000048828	FAM120A
ENSG00000049245	VAMP3
ENSG00000050130	JKAMP
ENSG00000050393	MCUR1
ENSG00000050438	SLC4A8
ENSG00000050748	MAPK9
ENSG00000051596	THOC3
ENSG00000051825	MPHOSPH9
ENSG00000052795	FNIP2
ENSG00000052802	MSMO1
ENSG00000052841	TTC17
ENSG00000054116	TRAPPC3
ENSG00000054118	THRAP3
ENSG00000054267	ARID4B
ENSG00000055147	FAM114A2
ENSG00000055208	TAB2
ENSG00000055332	EIF2AK2
ENSG00000055483	USP36
ENSG00000055917	PUM2
ENSG00000056586	RC3H2
ENSG00000057663	ATG5
ENSG00000058063	ATP11B
ENSG00000058600	POLR3E
ENSG00000058668	ATP2B4
ENSG00000058729	RIOK2
ENSG00000058799	YIPF1
ENSG00000058804	NDC1
ENSG00000059145	UNKL
ENSG00000059769	DNAJC25
ENSG00000060709	RIMBP2
ENSG00000060749	QSER1
ENSG00000060982	BCAT1
ENSG00000061794	MRPS35
ENSG00000062194	GPBP1
ENSG00000062650	WAPL
ENSG00000064115	TM7SF3
ENSG00000064225	ST3GAL6
ENSG00000064393	HIPK2
ENSG00000064651	SLC12A2
ENSG00000064726	BTBD1
ENSG00000064763	FAR2
ENSG00000065060	UHRF1BP1
ENSG00000065135	GNAI3
ENSG00000065328	MCM10
ENSG00000065609	SNAP91
ENSG00000065615	CYB5R4
ENSG00000065802	ASB1
ENSG00000065809	FAM107B
ENSG00000065883	CDK13
ENSG00000066084	DIP2B
ENSG00000066583	ISOC1
ENSG00000066629	EML1
ENSG00000066739	ATG2B
ENSG00000066855	MTFR1
ENSG00000067167	TRAM1
ENSG00000067177	PHKA1
ENSG00000067369	TP53BP1
ENSG00000067533	RRP15
ENSG00000067606	PRKCZ
ENSG00000067955	CBFB
ENSG00000068024	HDAC4
ENSG00000068305	MEF2A
ENSG00000068366	ACSL4
ENSG00000068438	FTSJ1
ENSG00000068489	PRR11
ENSG00000068912	ERLEC1
ENSG00000069248	NUP133
ENSG00000069431	ABCC9
ENSG00000069509	FUNDC1
ENSG00000069849	ATP1B3
ENSG00000069869	NEDD4
ENSG00000070018	LRP6
ENSG00000070061	ELP1
ENSG00000070423	RNF126
ENSG00000070718	AP3M2
ENSG00000070882	OSBPL3
ENSG00000070961	ATP2B1
ENSG00000071054	MAP4K4
ENSG00000071127	WDR1
ENSG00000071189	SNX13
ENSG00000071537	SEL1L
ENSG00000071994	PDCD2
ENSG00000072110	ACTN1
ENSG00000072133	RPS6KA6
ENSG00000072134	EPN2
ENSG00000072274	TFRC
ENSG00000072401	UBE2D1
ENSG00000072415	MPP5
ENSG00000072609	CHFR
ENSG00000072786	STK10
ENSG00000072849	DERL2
ENSG00000072864	NDE1
ENSG00000073464	CLCN4
ENSG00000073584	SMARCE1
ENSG00000073614	KDM5A
ENSG00000073712	FERMT2
ENSG00000073969	NSF
ENSG00000074266	EED
ENSG00000074603	DPP8
ENSG00000074695	LMAN1
ENSG00000074696	HACD3
ENSG00000074755	ZZEF1
ENSG00000075413	MARK3
ENSG00000075420	FNDC3B
ENSG00000075426	FOSL2
ENSG00000075539	FRYL
ENSG00000075711	DLG1
ENSG00000076108	BAZ2A
ENSG00000076248	UNG
ENSG00000077254	USP33
ENSG00000077279	DCX
ENSG00000077458	FAM76B
ENSG00000077514	POLD3
ENSG00000077616	NAALAD2
ENSG00000077721	UBE2A
ENSG00000078018	MAP2
ENSG00000078124	ACER3
ENSG00000078140	UBE2K
ENSG00000078142	PIK3C3
ENSG00000078369	GNB1
ENSG00000078687	TNRC6C
ENSG00000078699	CBFA2T2
ENSG00000078747	ITCH
ENSG00000079150	FKBP7
ENSG00000079246	XRCC5
ENSG00000079332	SAR1A
ENSG00000080371	RAB21
ENSG00000080608	PUM3
ENSG00000080802	CNOT4
ENSG00000080815	PSEN1
ENSG00000080819	CPOX
ENSG00000080839	RBL1
ENSG00000080845	DLGAP4
ENSG00000081154	PCNP
ENSG00000082146	STRADB
ENSG00000082258	CCNT2
ENSG00000082516	GEMIN5
ENSG00000082641	NFE2L1
ENSG00000082805	ERC1
ENSG00000082898	XPO1
ENSG00000083168	KAT6A
ENSG00000083457	ITGAE
ENSG00000083535	PIBF1
ENSG00000083635	NUFIP1
ENSG00000083642	PDS5B
ENSG00000083720	OXCT1
ENSG00000083750	RRAGB
ENSG00000083799	CYLD
ENSG00000084234	APLP2
ENSG00000084463	WBP11
ENSG00000084676	NCOA1
ENSG00000085063	CD59
ENSG00000085274	MYNN
ENSG00000085365	SCAMP1
ENSG00000085382	HACE1
ENSG00000085415	SEH1L
ENSG00000085433	WDR47
ENSG00000085563	ABCB1
ENSG00000085733	CTTN
ENSG00000085978	ATG16L1
ENSG00000086061	DNAJA1
ENSG00000086200	IPO11
ENSG00000086475	SEPHS1
ENSG00000086712	TXLNG
ENSG00000086848	ALG9
ENSG00000087448	KLHL42
ENSG00000087470	DNM1L
ENSG00000087586	AURKA
ENSG00000088247	KHSRP
ENSG00000088766	CRLS1
ENSG00000088833	NSFL1C
ENSG00000089006	SNX5
ENSG00000089009	RPL6
ENSG00000089094	KDM2B
ENSG00000089351	GRAMD1A
ENSG00000089682	RBM41
ENSG00000090054	SPTLC1
ENSG00000090061	CCNK
ENSG00000090520	DNAJB11
ENSG00000090615	GOLGA3
ENSG00000090686	USP48
ENSG00000090857	PDPR
ENSG00000090905	TNRC6A
ENSG00000091039	OSBPL8
ENSG00000091127	PUS7
ENSG00000091317	CMTM6
ENSG00000091527	CDV3
ENSG00000092051	JPH4
ENSG00000092140	G2E3
ENSG00000092203	TOX4
ENSG00000092421	SEMA6A
ENSG00000092439	TRPM7
ENSG00000092853	CLSPN
ENSG00000092964	DPYSL2
ENSG00000093000	NUP50
ENSG00000093144	ECHDC1
ENSG00000093167	LRRFIP2
ENSG00000093183	SEC22C
ENSG00000094841	UPRT
ENSG00000094975	SUCO
ENSG00000095209	TMEM38B
ENSG00000095787	WAC
ENSG00000096063	SRPK1
ENSG00000096092	TMEM14A
ENSG00000096401	CDC5L
ENSG00000096746	HNRNPH3
ENSG00000097033	SH3GLB1
ENSG00000097046	CDC7
ENSG00000099194	SCD
ENSG00000099246	RAB18
ENSG00000099256	PRTFDC1
ENSG00000099940	SNAP29
ENSG00000099995	SF3A1
ENSG00000100028	SNRPD3
ENSG00000100030	MAPK1
ENSG00000100034	PPM1F
ENSG00000100077	GRK3
ENSG00000100095	SEZ6L
ENSG00000100099	HPS4
ENSG00000100154	TTC28
ENSG00000100227	POLDIP3
ENSG00000100246	DNAL4
ENSG00000100294	MCAT
ENSG00000100297	MCM5
ENSG00000100345	MYH9
ENSG00000100354	TNRC6B
ENSG00000100364	KIAA0930
ENSG00000100372	SLC25A17
ENSG00000100376	FAM118A
ENSG00000100479	POLE2
ENSG00000100483	VCPKMT
ENSG00000100503	NIN
ENSG00000100519	PSMC6
ENSG00000100596	SPTLC2
ENSG00000100614	PPM1A
ENSG00000100650	SRSF5
ENSG00000100664	EIF5
ENSG00000100697	DICER1
ENSG00000100711	ZFYVE21
ENSG00000100731	PCNX1
ENSG00000100796	PPP4R3A
ENSG00000100852	ARHGAP5
ENSG00000100916	BRMS1L
ENSG00000101079	NDRG3
ENSG00000101144	BMP7
ENSG00000101146	RAE1
ENSG00000101189	MRGBP
ENSG00000101191	DIDO1
ENSG00000101193	GID8
ENSG00000101290	CDS2
ENSG00000101343	CRNKL1
ENSG00000101417	PXMP4
ENSG00000101544	ADNP2
ENSG00000101574	METTL4
ENSG00000101639	CEP192
ENSG00000101654	RNMT
ENSG00000101811	CSTF2
ENSG00000101844	ATG4A
ENSG00000101856	PGRMC1
ENSG00000101966	XIAP
ENSG00000101974	ATP11C
ENSG00000102024	PLS3
ENSG00000102038	SMARCA1
ENSG00000102081	FMR1
ENSG00000102158	MAGT1
ENSG00000102218	RP2
ENSG00000102393	GLA
ENSG00000102409	BEX4
ENSG00000102572	STK24
ENSG00000102580	DNAJC3
ENSG00000102606	ARHGEF7
ENSG00000102805	CLN5
ENSG00000102893	PHKB
ENSG00000102910	LONP2
ENSG00000102967	DHODH
ENSG00000102974	CTCF
ENSG00000103018	CYB5B
ENSG00000103061	SLC7A6OS
ENSG00000103064	SLC7A6
ENSG00000103091	WDR59
ENSG00000103222	ABCC1
ENSG00000103326	CAPN15
ENSG00000103351	CLUAP1
ENSG00000103353	UBFD1
ENSG00000103356	EARS2
ENSG00000103365	GGA2
ENSG00000103381	CPPED1
ENSG00000103479	RBL2
ENSG00000103540	CCP110
ENSG00000103591	AAGAB
ENSG00000103769	RAB11A
ENSG00000104067	TJP1
ENSG00000104093	DMXL2
ENSG00000104154	SLC30A4
ENSG00000104164	BLOC1S6
ENSG00000104177	MYEF2
ENSG00000104218	CSPP1
ENSG00000104219	ZDHHC2
ENSG00000104228	TRIM35
ENSG00000104231	ZFAND1
ENSG00000104313	EYA1
ENSG00000104320	NBN
ENSG00000104321	TRPA1
ENSG00000104356	POP1
ENSG00000104375	STK3
ENSG00000104388	RAB2A
ENSG00000104408	EIF3E
ENSG00000104427	ZC2HC1A
ENSG00000104472	CHRAC1
ENSG00000104490	NCALD
ENSG00000104497	SNX16
ENSG00000104643	MTMR9
ENSG00000104660	LEPROTL1
ENSG00000104691	UBXN8
ENSG00000104695	PPP2CB
ENSG00000104738	MCM4
ENSG00000104763	ASAH1
ENSG00000104904	OAZ1
ENSG00000104964	TLE5
ENSG00000104973	MED25
ENSG00000105127	AKAP8
ENSG00000105176	URI1
ENSG00000105229	PIAS4
ENSG00000105245	NUMBL
ENSG00000105270	CLIP3
ENSG00000105323	HNRNPUL1
ENSG00000105339	DENND3
ENSG00000105778	AVL9
ENSG00000105793	GTPBP10
ENSG00000105829	BET1
ENSG00000105849	TWISTNB
ENSG00000105865	DUS4L
ENSG00000105875	WDR91
ENSG00000105926	MPP6
ENSG00000105968	H2AZ2
ENSG00000105983	LMBR1
ENSG00000106080	FKBP14
ENSG00000106346	USP42
ENSG00000106355	LSM5
ENSG00000106609	TMEM248
ENSG00000106615	RHEB
ENSG00000106617	PRKAG2
ENSG00000106636	YKT6
ENSG00000106692	FKTN
ENSG00000106771	TMEM245
ENSG00000106780	MEGF9
ENSG00000106799	TGFBR1
ENSG00000107130	NCS1
ENSG00000107185	RGP1
ENSG00000107262	BAG1
ENSG00000107290	SETX
ENSG00000107338	SHB
ENSG00000107341	UBE2R2
ENSG00000107362	ABHD17B
ENSG00000107372	ZFAND5
ENSG00000107560	RAB11FIP2
ENSG00000107581	EIF3A
ENSG00000107643	MAPK8
ENSG00000107731	UNC5B
ENSG00000107779	BMPR1A
ENSG00000107882	SUFU
ENSG00000107897	ACBD5
ENSG00000107929	LARP4B
ENSG00000107949	BCCIP
ENSG00000107984	DKK1
ENSG00000108018	SORCS1
ENSG00000108064	TFAM
ENSG00000108094	CUL2
ENSG00000108100	CCNY
ENSG00000108175	ZMIZ1
ENSG00000108176	DNAJC12
ENSG00000108239	TBC1D12
ENSG00000108312	UBTF
ENSG00000108370	RGS9
ENSG00000108379	WNT3
ENSG00000108389	MTMR4
ENSG00000108443	RPS6KB1
ENSG00000108510	MED13
ENSG00000108582	CPD
ENSG00000108799	EZH1
ENSG00000108829	LRRC59
ENSG00000108946	PRKAR1A
ENSG00000109079	TNFAIP1
ENSG00000109118	PHF12
ENSG00000109133	TMEM33
ENSG00000109171	SLAIN2
ENSG00000109265	CRACD
ENSG00000109332	UBE2D3
ENSG00000109436	TBC1D9
ENSG00000109519	GRPEL1
ENSG00000109572	CLCN3
ENSG00000109654	TRIM2
ENSG00000109685	NSD2
ENSG00000109689	STIM2
ENSG00000109787	KLF3
ENSG00000109819	PPARGC1A
ENSG00000109854	HTATIP2
ENSG00000109919	MTCH2
ENSG00000109991	P2RX3
ENSG00000110063	DCPS
ENSG00000110075	PPP6R3
ENSG00000110172	CHORDC1
ENSG00000110218	PANX1
ENSG00000110367	DDX6
ENSG00000110400	NECTIN1
ENSG00000110422	HIPK3
ENSG00000110713	NUP98
ENSG00000110841	PPFIBP1
ENSG00000110880	CORO1C
ENSG00000110881	ASIC1
ENSG00000110906	KCTD10
ENSG00000110911	SLC11A2
ENSG00000110917	MLEC
ENSG00000110925	CSRNP2
ENSG00000110958	PTGES3
ENSG00000111011	RSRC2
ENSG00000111052	LIN7A
ENSG00000111142	METAP2
ENSG00000111196	MAGOHB
ENSG00000111247	RAD51AP1
ENSG00000111266	DUSP16
ENSG00000111300	NAA25
ENSG00000111412	C12orf49
ENSG00000111530	CAND1
ENSG00000111581	NUP107
ENSG00000111596	CNOT2
ENSG00000111605	CPSF6
ENSG00000111615	KRR1
ENSG00000111647	UHRF1BP1L
ENSG00000111666	CHPT1
ENSG00000111707	SUDS3
ENSG00000111711	GOLT1B
ENSG00000111737	RAB35
ENSG00000111785	RIC8B
ENSG00000111790	FGFR1OP2
ENSG00000111802	TDP2
ENSG00000111885	MAN1A1
ENSG00000111911	HINT3
ENSG00000111912	NCOA7
ENSG00000112038	OPRM1
ENSG00000112146	FBXO9
ENSG00000112210	RAB23
ENSG00000112242	E2F3
ENSG00000112245	PTP4A1
ENSG00000112249	ASCC3
ENSG00000112276	BVES
ENSG00000112294	ALDH5A1
ENSG00000112697	TMEM30A
ENSG00000112742	TTK
ENSG00000112787	FBRSL1
ENSG00000112851	ERBIN
ENSG00000112852	PCDHB2
ENSG00000112893	MAN2A1
ENSG00000112972	HMGCS1
ENSG00000112996	MRPS30
ENSG00000113161	HMGCR
ENSG00000113163	CERT1
ENSG00000113248	PCDHB15
ENSG00000113269	RNF130
ENSG00000113273	ARSB
ENSG00000113282	CLINT1
ENSG00000113327	GABRG2
ENSG00000113360	DROSHA
ENSG00000113387	SUB1
ENSG00000113407	TARS1
ENSG00000113441	LNPEP
ENSG00000113456	RAD1
ENSG00000113522	RAD50
ENSG00000113569	NUP155
ENSG00000113597	TRAPPC13
ENSG00000113615	SEC24A
ENSG00000113638	TTC33
ENSG00000113649	TCERG1
ENSG00000113657	DPYSL3
ENSG00000113658	SMAD5
ENSG00000113739	STC2
ENSG00000113742	CPEB4
ENSG00000113810	SMC4
ENSG00000113811	SELENOK
ENSG00000113851	CRBN
ENSG00000113966	ARL6
ENSG00000114021	NIT2
ENSG00000114023	FAM162A
ENSG00000114054	PCCB
ENSG00000114120	SLC25A36
ENSG00000114331	ACAP2
ENSG00000114346	ECT2
ENSG00000114405	C3orf14
ENSG00000114416	FXR1
ENSG00000114423	CBLB
ENSG00000114439	BBX
ENSG00000114450	GNB4
ENSG00000114480	GBE1
ENSG00000114503	NCBP2
ENSG00000114520	SNX4
ENSG00000114554	PLXNA1
ENSG00000114573	ATP6V1A
ENSG00000114686	MRPL3
ENSG00000114744	COMMD2
ENSG00000114796	KLHL24
ENSG00000114857	NKTR
ENSG00000114861	FOXP1
ENSG00000114978	MOB1A
ENSG00000114988	LMAN2L
ENSG00000115084	SLC35F5
ENSG00000115091	ACTR3
ENSG00000115183	TANC1
ENSG00000115295	CLIP4
ENSG00000115355	CCDC88A
ENSG00000115425	PECR
ENSG00000115514	TXNDC9
ENSG00000115540	MOB4
ENSG00000115561	CHMP3
ENSG00000115652	UXS1
ENSG00000115677	HDLBP
ENSG00000115750	TAF1B
ENSG00000115762	PLEKHB2
ENSG00000115827	DCAF17
ENSG00000115875	SRSF7
ENSG00000115904	SOS1
ENSG00000115935	WIPF1
ENSG00000115963	RND3
ENSG00000115966	ATF2
ENSG00000116005	PCYOX1
ENSG00000116016	EPAS1
ENSG00000116017	ARID3A
ENSG00000116030	SUMO1
ENSG00000116138	DNAJC16
ENSG00000116161	CACYBP
ENSG00000116198	CEP104
ENSG00000116199	FAM20B
ENSG00000116209	TMEM59
ENSG00000116251	RPL22
ENSG00000116260	QSOX1
ENSG00000116574	RHOU
ENSG00000116604	MEF2D
ENSG00000116667	C1orf21
ENSG00000116679	IVNS1ABP
ENSG00000116685	KIAA2013
ENSG00000116698	SMG7
ENSG00000116704	SLC35D1
ENSG00000116747	RO60
ENSG00000116791	CRYZ
ENSG00000116815	CD58
ENSG00000116857	TMEM9
ENSG00000116903	EXOC8
ENSG00000117000	RLF
ENSG00000117016	RIMS3
ENSG00000117020	AKT3
ENSG00000117069	ST6GALNAC5
ENSG00000117114	ADGRL2
ENSG00000117155	SSX2IP
ENSG00000117174	ZNHIT6
ENSG00000117461	PIK3R3
ENSG00000117479	SLC19A2
ENSG00000117481	NSUN4
ENSG00000117500	TMED5
ENSG00000117505	DR1
ENSG00000117519	CNN3
ENSG00000117533	VAMP4
ENSG00000117543	DPH5
ENSG00000117592	PRDX6
ENSG00000117597	UTP25
ENSG00000117614	SYF2
ENSG00000117625	RCOR3
ENSG00000117640	MTFR1L
ENSG00000117643	MAN1C1
ENSG00000117868	ESYT2
ENSG00000118007	STAG1
ENSG00000118200	CAMSAP2
ENSG00000118242	MREG
ENSG00000118257	NRP2
ENSG00000118260	CREB1
ENSG00000118363	SPCS2
ENSG00000118402	ELOVL4
ENSG00000118418	HMGN3
ENSG00000118482	PHF3
ENSG00000118579	MED28
ENSG00000118596	SLC16A7
ENSG00000118600	RXYLT1
ENSG00000118655	DCLRE1B
ENSG00000118733	OLFM3
ENSG00000118855	MFSD1
ENSG00000119041	GTF3C3
ENSG00000119138	KLF9
ENSG00000119231	SENP5
ENSG00000119314	PTBP3
ENSG00000119318	RAD23B
ENSG00000119321	FKBP15
ENSG00000119335	SET
ENSG00000119392	GLE1
ENSG00000119402	FBXW2
ENSG00000119446	RBM18
ENSG00000119487	MAPKAP1
ENSG00000119509	INVS
ENSG00000119523	ALG2
ENSG00000119537	KDSR
ENSG00000119640	ACYP1
ENSG00000119707	RBM25
ENSG00000119760	SUPT7L
ENSG00000119787	ATL2
ENSG00000119927	GPAM
ENSG00000119953	SMNDC1
ENSG00000119969	HELLS
ENSG00000120053	GOT1
ENSG00000120137	PANK3
ENSG00000120253	NUP43
ENSG00000120265	PCMT1
ENSG00000120327	PCDHB14
ENSG00000120526	NUDCD1
ENSG00000120539	MASTL
ENSG00000120658	ENOX1
ENSG00000120685	PROSER1
ENSG00000120686	UFM1
ENSG00000120705	ETF1
ENSG00000120725	SIL1
ENSG00000120727	PAIP2
ENSG00000120742	SERP1
ENSG00000120784	ZFP30
ENSG00000120798	NR2C1
ENSG00000120805	ARL1
ENSG00000120868	APAF1
ENSG00000120875	DUSP4
ENSG00000120889	TNFRSF10B
ENSG00000120925	RNF170
ENSG00000120942	UBIAD1
ENSG00000120948	TARDBP
ENSG00000120963	ZNF706
ENSG00000121005	CRISPLD1
ENSG00000121039	RDH10
ENSG00000121064	SCPEP1
ENSG00000121274	TENT4B
ENSG00000121481	RNF2
ENSG00000121542	SEC22A
ENSG00000121579	NAA50
ENSG00000121621	KIF18A
ENSG00000121749	TBC1D15
ENSG00000121774	KHDRBS1
ENSG00000121864	ZNF639
ENSG00000122042	UBL3
ENSG00000122378	PRXL2A
ENSG00000122435	TRMT13
ENSG00000122484	RPAP2
ENSG00000122490	SLC66A2
ENSG00000122565	CBX3
ENSG00000122643	NT5C3A
ENSG00000122778	KIAA1549
ENSG00000122786	CALD1
ENSG00000122952	ZWINT
ENSG00000122958	VPS26A
ENSG00000122966	CIT
ENSG00000123066	MED13L
ENSG00000123104	ITPR2
ENSG00000123213	NLN
ENSG00000123268	ATF1
ENSG00000123297	TSFM
ENSG00000123454	DBH
ENSG00000123472	ATPAF1
ENSG00000123505	AMD1
ENSG00000123545	NDUFAF4
ENSG00000123575	FAM199X
ENSG00000123739	PLA2G12A
ENSG00000123933	MXD4
ENSG00000123983	ACSL3
ENSG00000123992	DNPEP
ENSG00000124067	SLC12A4
ENSG00000124120	TTPAL
ENSG00000124145	SDC4
ENSG00000124164	VAPB
ENSG00000124193	SRSF6
ENSG00000124198	ARFGEF2
ENSG00000124207	CSE1L
ENSG00000124226	RNF114
ENSG00000124356	STAMBP
ENSG00000124406	ATP8A1
ENSG00000124444	ZNF576
ENSG00000124486	USP9X
ENSG00000124496	TRERF1
ENSG00000124571	XPO5
ENSG00000124608	AARS2
ENSG00000124659	TBCC
ENSG00000124767	GLO1
ENSG00000124789	NUP153
ENSG00000125107	CNOT1
ENSG00000125266	EFNB2
ENSG00000125304	TM9SF2
ENSG00000125375	DMAC2L
ENSG00000125384	PTGER2
ENSG00000125398	SOX9
ENSG00000125485	DDX31
ENSG00000125505	MBOAT7
ENSG00000125630	POLR1B
ENSG00000125676	THOC2
ENSG00000125695	AC046185.1
ENSG00000125741	OPA3
ENSG00000125812	GZF1
ENSG00000125814	NAPB
ENSG00000125827	TMX4
ENSG00000125863	MKKS
ENSG00000125868	DSTN
ENSG00000125870	SNRPB2
ENSG00000125912	NCLN
ENSG00000125977	EIF2S2
ENSG00000126067	PSMB2
ENSG00000126214	KLC1
ENSG00000126226	PCID2
ENSG00000126464	PRR12
ENSG00000126767	ELK1
ENSG00000126777	KTN1
ENSG00000126790	L3HYPDH
ENSG00000126814	TRMT5
ENSG00000126822	PLEKHG3
ENSG00000127191	TRAF2
ENSG00000127334	DYRK2
ENSG00000127463	EMC1
ENSG00000127483	HP1BP3
ENSG00000127603	MACF1
ENSG00000127663	KDM4B
ENSG00000127914	AKAP9
ENSG00000127955	GNAI1
ENSG00000128039	SRD5A3
ENSG00000128050	PAICS
ENSG00000128059	PPAT
ENSG00000128294	TPST2
ENSG00000128534	LSM8
ENSG00000128536	CDHR3
ENSG00000128581	IFT22
ENSG00000128585	MKLN1
ENSG00000128607	KLHDC10
ENSG00000128609	NDUFA5
ENSG00000128641	MYO1B
ENSG00000128652	HOXD3
ENSG00000128656	CHN1
ENSG00000128699	ORMDL1
ENSG00000128731	HERC2
ENSG00000128791	TWSG1
ENSG00000128872	TMOD2
ENSG00000128881	TTBK2
ENSG00000128989	ARPP19
ENSG00000129003	VPS13C
ENSG00000129055	ANAPC13
ENSG00000129116	PALLD
ENSG00000129128	SPCS3
ENSG00000129187	DCTD
ENSG00000129480	DTD2
ENSG00000129493	HEATR5A
ENSG00000129534	MIS18BP1
ENSG00000129657	SEC14L1
ENSG00000129680	MAP7D3
ENSG00000129933	MAU2
ENSG00000129990	SYT5
ENSG00000130021	PUDP
ENSG00000130147	SH3BP4
ENSG00000130150	MOSPD2
ENSG00000130227	XPO7
ENSG00000130294	KIF1A
ENSG00000130311	DDA1
ENSG00000130340	SNX9
ENSG00000130414	NDUFA10
ENSG00000130714	POMT1
ENSG00000130723	PRRC2B
ENSG00000130741	EIF2S3
ENSG00000130939	UBE4B
ENSG00000131016	AKAP12
ENSG00000131051	RBM39
ENSG00000131089	ARHGEF9
ENSG00000131148	EMC8
ENSG00000131171	SH3BGRL
ENSG00000131269	ABCB7
ENSG00000131323	TRAF3
ENSG00000131368	MRPS25
ENSG00000131437	KIF3A
ENSG00000131467	PSME3
ENSG00000131473	ACLY
ENSG00000131503	ANKHD1
ENSG00000131507	NDFIP1
ENSG00000131508	UBE2D2
ENSG00000131626	PPFIA1
ENSG00000131773	KHDRBS3
ENSG00000131828	PDHA1
ENSG00000131844	MCCC2
ENSG00000131943	C19orf12
ENSG00000131979	GCH1
ENSG00000132182	NUP210
ENSG00000132294	EFR3A
ENSG00000132330	SCLY
ENSG00000132341	RAN
ENSG00000132394	EEFSEC
ENSG00000132405	TBC1D14
ENSG00000132406	TMEM128
ENSG00000132424	PNISR
ENSG00000132434	LANCL2
ENSG00000132467	UTP3
ENSG00000132549	VPS13B
ENSG00000132603	NIP7
ENSG00000132669	RIN2
ENSG00000132670	PTPRA
ENSG00000132718	SYT11
ENSG00000132740	IGHMBP2
ENSG00000132952	USPL1
ENSG00000132953	XPO4
ENSG00000133026	MYH10
ENSG00000133028	SCO1
ENSG00000133030	MPRIP
ENSG00000133103	COG6
ENSG00000133104	SPART
ENSG00000133114	GPALPP1
ENSG00000133142	TCEAL4
ENSG00000133302	SLF1
ENSG00000133393	CEP20
ENSG00000133398	MED10
ENSG00000133627	ACTR3B
ENSG00000133641	C12orf29
ENSG00000133687	TMTC1
ENSG00000133703	KRAS
ENSG00000133704	IPO8
ENSG00000133731	IMPA1
ENSG00000133789	SWAP70
ENSG00000133812	SBF2
ENSG00000133958	UNC79
ENSG00000133961	NUMB
ENSG00000134001	EIF2S1
ENSG00000134014	ELP3
ENSG00000134057	CCNB1
ENSG00000134077	THUMPD3
ENSG00000134086	VHL
ENSG00000134109	EDEM1
ENSG00000134146	DPH6
ENSG00000134186	PRPF38B
ENSG00000134247	PTGFRN
ENSG00000134255	CEPT1
ENSG00000134265	NAPG
ENSG00000134278	SPIRE1
ENSG00000134308	YWHAQ
ENSG00000134324	LPIN1
ENSG00000134375	TIMM17A
ENSG00000134533	RERG
ENSG00000134744	TUT4
ENSG00000134748	PRPF38A
ENSG00000134824	FADS2
ENSG00000134851	TMEM165
ENSG00000134874	DZIP1
ENSG00000134882	UBAC2
ENSG00000134900	TPP2
ENSG00000134986	NREP
ENSG00000135002	RFK
ENSG00000135018	UBQLN1
ENSG00000135040	NAA35
ENSG00000135045	C9orf40
ENSG00000135048	CEMIP2
ENSG00000135052	GOLM1
ENSG00000135070	ISCA1
ENSG00000135111	TBX3
ENSG00000135119	RNFT2
ENSG00000135387	CAPRIN1
ENSG00000135457	TFCP2
ENSG00000135486	HNRNPA1
ENSG00000135503	ACVR1B
ENSG00000135525	MAP7
ENSG00000135541	AHI1
ENSG00000135655	USP15
ENSG00000135698	MPHOSPH6
ENSG00000135720	DYNC1LI2
ENSG00000135766	EGLN1
ENSG00000135776	ABCB10
ENSG00000135821	GLUL
ENSG00000135837	CEP350
ENSG00000135862	LAMC1
ENSG00000135900	MRPL44
ENSG00000135913	USP37
ENSG00000135956	TMEM127
ENSG00000135966	TGFBRAP1
ENSG00000135974	C2orf49
ENSG00000136021	SCYL2
ENSG00000136044	APPL2
ENSG00000136045	PWP1
ENSG00000136068	FLNB
ENSG00000136111	TBC1D4
ENSG00000136141	LRCH1
ENSG00000136152	COG3
ENSG00000136193	SCRN1
ENSG00000136231	IGF2BP3
ENSG00000136270	TBRG4
ENSG00000136319	TTC5
ENSG00000136381	IREB2
ENSG00000136448	NMT1
ENSG00000136451	VEZF1
ENSG00000136478	TEX2
ENSG00000136504	KAT7
ENSG00000136521	NDUFB5
ENSG00000136536	MARCHF7
ENSG00000136574	GATA4
ENSG00000136603	SKIL
ENSG00000136643	RPS6KC1
ENSG00000136718	IMP4
ENSG00000136731	UGGT1
ENSG00000136738	STAM
ENSG00000136754	ABI1
ENSG00000136758	YME1L1
ENSG00000136813	ECPAS
ENSG00000136819	C9orf78
ENSG00000136828	RALGPS1
ENSG00000136859	ANGPTL2
ENSG00000136868	SLC31A1
ENSG00000136932	TRMO
ENSG00000136935	GOLGA1
ENSG00000136936	XPA
ENSG00000136950	ARPC5L
ENSG00000136960	ENPP2
ENSG00000136986	DERL1
ENSG00000137075	RNF38
ENSG00000137142	IGFBPL1
ENSG00000137449	CPEB2
ENSG00000137500	CCDC90B
ENSG00000137513	NARS2
ENSG00000137522	RNF121
ENSG00000137547	MRPL15
ENSG00000137601	NEK1
ENSG00000137642	SORL1
ENSG00000137710	RDX
ENSG00000137764	MAP2K5
ENSG00000137770	CTDSPL2
ENSG00000137776	SLTM
ENSG00000137812	KNL1
ENSG00000137814	HAUS2
ENSG00000137815	RTF1
ENSG00000137845	ADAM10
ENSG00000137944	KYAT3
ENSG00000137955	RABGGTB
ENSG00000137996	RTCA
ENSG00000138018	SELENOI
ENSG00000138036	DYNC2LI1
ENSG00000138078	PREPL
ENSG00000138081	FBXO11
ENSG00000138134	STAMBPL1
ENSG00000138162	TACC2
ENSG00000138182	KIF20B
ENSG00000138231	DBR1
ENSG00000138303	ASCC1
ENSG00000138376	BARD1
ENSG00000138398	PPIG
ENSG00000138439	FAM117B
ENSG00000138442	WDR12
ENSG00000138443	ABI2
ENSG00000138468	SENP7
ENSG00000138604	GLCE
ENSG00000138613	APH1B
ENSG00000138660	AP1AR
ENSG00000138668	HNRNPD
ENSG00000138696	BMPR1B
ENSG00000138698	RAP1GDS1
ENSG00000138756	BMP2K
ENSG00000138758	SEPTIN11
ENSG00000138760	SCARB2
ENSG00000138767	CNOT6L
ENSG00000138768	USO1
ENSG00000138771	SHROOM3
ENSG00000139083	ETV6
ENSG00000139132	FGD4
ENSG00000139163	ETNK1
ENSG00000139289	PHLDA1
ENSG00000139291	TMEM19
ENSG00000139324	TMTC3
ENSG00000139372	TDG
ENSG00000139437	TCHP
ENSG00000139508	SLC46A3
ENSG00000139625	MAP3K12
ENSG00000139734	DIAPH3
ENSG00000139746	RBM26
ENSG00000139767	SRRM4
ENSG00000139793	MBNL2
ENSG00000139921	TMX1
ENSG00000139990	DCAF5
ENSG00000140332	TLE3
ENSG00000140367	UBE2Q2
ENSG00000140382	HMG20A
ENSG00000140450	ARRDC4
ENSG00000140470	ADAMTS17
ENSG00000140526	ABHD2
ENSG00000140538	NTRK3
ENSG00000140557	ST8SIA2
ENSG00000140575	IQGAP1
ENSG00000140577	CRTC3
ENSG00000140740	UQCRC2
ENSG00000140836	ZFHX3
ENSG00000140939	NOL3
ENSG00000141127	PRPSAP2
ENSG00000141252	VPS53
ENSG00000141279	NPEPPS
ENSG00000141298	SSH2
ENSG00000141378	PTRH2
ENSG00000141385	AFG3L2
ENSG00000141425	RPRD1A
ENSG00000141551	CSNK1D
ENSG00000141568	FOXK2
ENSG00000141570	CBX8
ENSG00000141627	DYM
ENSG00000141646	SMAD4
ENSG00000141867	BRD4
ENSG00000142039	CCDC97
ENSG00000142168	SOD1
ENSG00000142188	TMEM50B
ENSG00000142396	ERVK3-1
ENSG00000142556	ZNF614
ENSG00000142599	RERE
ENSG00000142634	EFHD2
ENSG00000142655	PEX14
ENSG00000142731	PLK4
ENSG00000142864	SERBP1
ENSG00000143061	IGSF3
ENSG00000143155	TIPRL
ENSG00000143179	UCK2
ENSG00000143315	PIGM
ENSG00000143319	ISG20L2
ENSG00000143322	ABL2
ENSG00000143337	TOR1AIP1
ENSG00000143353	LYPLAL1
ENSG00000143390	RFX5
ENSG00000143429	LSP1P4
ENSG00000143457	GOLPH3L
ENSG00000143476	DTL
ENSG00000143514	TP53BP2
ENSG00000143622	RIT1
ENSG00000143641	GALNT2
ENSG00000143643	TTC13
ENSG00000143653	SCCPDH
ENSG00000143727	ACP1
ENSG00000143751	SDE2
ENSG00000143753	DEGS1
ENSG00000143756	FBXO28
ENSG00000143776	CDC42BPA
ENSG00000143797	MBOAT2
ENSG00000143870	PDIA6
ENSG00000143924	EML4
ENSG00000143952	VPS54
ENSG00000144231	POLR2D
ENSG00000144233	AMMECR1L
ENSG00000144278	GALNT13
ENSG00000144306	SCRN3
ENSG00000144366	GULP1
ENSG00000144406	UNC80
ENSG00000144451	SPAG16
ENSG00000144452	ABCA12
ENSG00000144468	RHBDD1
ENSG00000144566	RAB5A
ENSG00000144668	ITGA9
ENSG00000144677	CTDSPL
ENSG00000144711	IQSEC1
ENSG00000144744	UBA3
ENSG00000144785	AC073896.1
ENSG00000144827	ABHD10
ENSG00000144867	SRPRB
ENSG00000144868	TMEM108
ENSG00000144893	MED12L
ENSG00000144909	OSBPL11
ENSG00000145022	TCTA
ENSG00000145284	SCD5
ENSG00000145362	ANK2
ENSG00000145386	CCNA2
ENSG00000145388	METTL14
ENSG00000145414	NAF1
ENSG00000145495	MARCHF6
ENSG00000145569	OTULINL
ENSG00000145592	RPL37
ENSG00000145675	PIK3R1
ENSG00000145685	LHFPL2
ENSG00000145687	SSBP2
ENSG00000145715	RASA1
ENSG00000145723	GIN1
ENSG00000145730	PAM
ENSG00000145780	FEM1C
ENSG00000145817	YIPF5
ENSG00000145819	ARHGAP26
ENSG00000145868	FBXO38
ENSG00000146083	RNF44
ENSG00000146085	MMUT
ENSG00000146109	ABT1
ENSG00000146243	IRAK1BP1
ENSG00000146263	MMS22L
ENSG00000146267	FAXC
ENSG00000146278	PNRC1
ENSG00000146373	RNF217
ENSG00000146426	TIAM2
ENSG00000146476	ARMT1
ENSG00000146587	RBAK
ENSG00000146648	EGFR
ENSG00000146676	PURB
ENSG00000146731	CCT6A
ENSG00000146872	TLK2
ENSG00000146963	LUC7L2
ENSG00000147099	HDAC8
ENSG00000147140	NONO
ENSG00000147162	OGT
ENSG00000147364	FBXO25
ENSG00000147416	ATP6V1B2
ENSG00000147421	HMBOX1
ENSG00000147459	DOCK5
ENSG00000147533	GOLGA7
ENSG00000147535	PLPP5
ENSG00000147592	LACTB2
ENSG00000147604	RPL7
ENSG00000147654	EBAG9
ENSG00000147669	POLR2K
ENSG00000147679	UTP23
ENSG00000147853	AK3
ENSG00000147912	FBXO10
ENSG00000148082	SHC3
ENSG00000148153	INIP
ENSG00000148408	CACNA1B
ENSG00000148411	NACC2
ENSG00000148516	ZEB1
ENSG00000148688	RPP30
ENSG00000148773	MKI67
ENSG00000148842	CNNM2
ENSG00000149187	CELF1
ENSG00000149231	CCDC82
ENSG00000149260	CAPN5
ENSG00000149294	NCAM1
ENSG00000149313	AASDHPPT
ENSG00000149503	INCENP
ENSG00000149636	DSN1
ENSG00000149930	TAOK2
ENSG00000150347	ARID5B
ENSG00000150401	DCUN1D2
ENSG00000150593	PDCD4
ENSG00000150712	MTMR12
ENSG00000150787	PTS
ENSG00000151014	NOCT
ENSG00000151131	C12orf45
ENSG00000151208	DLG5
ENSG00000151233	GXYLT1
ENSG00000151276	MAGI1
ENSG00000151292	CSNK1G3
ENSG00000151327	FAM177A1
ENSG00000151490	PTPRO
ENSG00000151502	VPS26B
ENSG00000151617	EDNRA
ENSG00000151690	MFSD6
ENSG00000151694	ADAM17
ENSG00000151725	CENPU
ENSG00000151726	ACSL1
ENSG00000151748	SAV1
ENSG00000151806	GUF1
ENSG00000151835	SACS
ENSG00000151881	TMEM267
ENSG00000151893	CACUL1
ENSG00000151923	TIAL1
ENSG00000152102	FAM168B
ENSG00000152127	MGAT5
ENSG00000152133	GPATCH11
ENSG00000152219	ARL14EP
ENSG00000152242	C18orf25
ENSG00000152492	CCDC50
ENSG00000152503	TRIM36
ENSG00000152558	TMEM123
ENSG00000152642	GPD1L
ENSG00000152683	SLC30A6
ENSG00000152749	GPR180
ENSG00000152767	FARP1
ENSG00000152778	IFIT5
ENSG00000152795	HNRNPDL
ENSG00000152932	RAB3C
ENSG00000152944	MED21
ENSG00000153046	CDYL
ENSG00000153094	BCL2L11
ENSG00000153140	CETN3
ENSG00000153147	SMARCA5
ENSG00000153187	HNRNPU
ENSG00000153201	RANBP2
ENSG00000153233	PTPRR
ENSG00000153253	SCN3A
ENSG00000153310	CYRIB
ENSG00000153317	ASAP1
ENSG00000153560	UBP1
ENSG00000153574	RPIA
ENSG00000153786	ZDHHC7
ENSG00000153814	JAZF1
ENSG00000153879	CEBPG
ENSG00000153914	SREK1
ENSG00000153944	MSI2
ENSG00000153982	GDPD1
ENSG00000153989	NUS1
ENSG00000154059	IMPACT
ENSG00000154122	ANKH
ENSG00000154229	PRKCA
ENSG00000154305	MIA3
ENSG00000154380	ENAH
ENSG00000154429	CCSAP
ENSG00000154447	SH3RF1
ENSG00000154556	SORBS2
ENSG00000154642	C21orf91
ENSG00000154645	CHODL
ENSG00000154813	DPH3
ENSG00000154945	ANKRD40
ENSG00000154997	SEPTIN14
ENSG00000155008	APOOL
ENSG00000155016	CYP2U1
ENSG00000155093	PTPRN2
ENSG00000155097	ATP6V1C1
ENSG00000155099	PIP4P2
ENSG00000155508	CNOT8
ENSG00000155545	MIER3
ENSG00000155755	TMEM237
ENSG00000155760	FZD7
ENSG00000155792	DEPTOR
ENSG00000155893	PXYLP1
ENSG00000155959	VBP1
ENSG00000155975	VPS37A
ENSG00000156011	PSD3
ENSG00000156017	CARNMT1
ENSG00000156103	MMP16
ENSG00000156113	KCNMA1
ENSG00000156162	DPY19L4
ENSG00000156171	DRAM2
ENSG00000156239	N6AMT1
ENSG00000156381	ANKRD9
ENSG00000156521	TYSND1
ENSG00000156531	PHF6
ENSG00000156639	ZFAND3
ENSG00000156642	NPTN
ENSG00000156671	SAMD8
ENSG00000156735	BAG4
ENSG00000156795	NTAQ1
ENSG00000156873	PHKG2
ENSG00000156976	EIF4A2
ENSG00000157064	NMNAT2
ENSG00000157106	SMG1
ENSG00000157212	PAXIP1
ENSG00000157216	SSBP3
ENSG00000157240	FZD1
ENSG00000157259	GATAD1
ENSG00000157445	CACNA2D3
ENSG00000157500	APPL1
ENSG00000157538	VPS26C
ENSG00000157600	TMEM164
ENSG00000157637	SLC38A10
ENSG00000157764	BRAF
ENSG00000157823	AP3S2
ENSG00000157916	RER1
ENSG00000157933	SKI
ENSG00000158092	NCK1
ENSG00000158122	PRXL2C
ENSG00000158169	FANCC
ENSG00000158201	ABHD3
ENSG00000158258	CLSTN2
ENSG00000158467	AHCYL2
ENSG00000158615	PPP1R15B
ENSG00000158636	EMSY
ENSG00000158669	GPAT4
ENSG00000158711	ELK4
ENSG00000158985	CDC42SE2
ENSG00000159082	SYNJ1
ENSG00000159147	DONSON
ENSG00000159459	UBR1
ENSG00000159461	AMFR
ENSG00000160007	ARHGAP35
ENSG00000160014	CALM3
ENSG00000160131	VMA21
ENSG00000160145	KALRN
ENSG00000160208	RRP1B
ENSG00000160584	SIK3
ENSG00000160679	CHTOP
ENSG00000160714	UBE2Q1
ENSG00000161057	PSMC2
ENSG00000161533	ACOX1
ENSG00000161542	PRPSAP1
ENSG00000161547	SRSF2
ENSG00000161551	ZNF577
ENSG00000161800	RACGAP1
ENSG00000161888	SPC24
ENSG00000162063	CCNF
ENSG00000162073	PAQR4
ENSG00000162104	ADCY9
ENSG00000162129	CLPB
ENSG00000162174	ASRGL1
ENSG00000162368	CMPK1
ENSG00000162378	ZYG11B
ENSG00000162402	USP24
ENSG00000162419	GMEB1
ENSG00000162434	JAK1
ENSG00000162441	LZIC
ENSG00000162545	CAMK2N1
ENSG00000162623	TYW3
ENSG00000162642	C1orf52
ENSG00000162664	ZNF326
ENSG00000162687	KCNT2
ENSG00000162688	AGL
ENSG00000162733	DDR2
ENSG00000162849	KIF26B
ENSG00000162885	B3GALNT2
ENSG00000162980	ARL5A
ENSG00000163006	CCDC138
ENSG00000163029	SMC6
ENSG00000163104	SMARCAD1
ENSG00000163125	RPRD2
ENSG00000163249	CCNYL1
ENSG00000163251	FZD5
ENSG00000163291	PAQR3
ENSG00000163297	ANTXR2
ENSG00000163320	CGGBP1
ENSG00000163349	HIPK1
ENSG00000163376	KBTBD8
ENSG00000163389	POGLUT1
ENSG00000163428	LRRC58
ENSG00000163510	CWC22
ENSG00000163531	NFASC
ENSG00000163539	CLASP2
ENSG00000163558	PRKCI
ENSG00000163577	EIF5A2
ENSG00000163618	CADPS
ENSG00000163623	NKX6-1
ENSG00000163626	COX18
ENSG00000163660	CCNL1
ENSG00000163681	SLMAP
ENSG00000163683	SMIM14
ENSG00000163684	RPP14
ENSG00000163686	ABHD6
ENSG00000163714	U2SURP
ENSG00000163743	RCHY1
ENSG00000163811	WDR43
ENSG00000163812	ZDHHC3
ENSG00000163832	ELP6
ENSG00000163840	DTX3L
ENSG00000163866	SMIM12
ENSG00000163873	GRIK3
ENSG00000163875	MEAF6
ENSG00000163877	SNIP1
ENSG00000163938	GNL3
ENSG00000163939	PBRM1
ENSG00000163945	UVSSA
ENSG00000163946	TASOR
ENSG00000164040	PGRMC2
ENSG00000164050	PLXNB1
ENSG00000164061	BSN
ENSG00000164074	ABHD18
ENSG00000164096	C4orf3
ENSG00000164099	PRSS12
ENSG00000164105	SAP30
ENSG00000164107	HAND2
ENSG00000164109	MAD2L1
ENSG00000164114	MAP9
ENSG00000164118	CEP44
ENSG00000164134	NAA15
ENSG00000164144	ARFIP1
ENSG00000164168	TMEM184C
ENSG00000164187	LMBRD2
ENSG00000164209	SLC25A46
ENSG00000164211	STARD4
ENSG00000164244	PRRC1
ENSG00000164253	WDR41
ENSG00000164291	ARSK
ENSG00000164292	RHOBTB3
ENSG00000164300	SERINC5
ENSG00000164323	CFAP97
ENSG00000164329	TENT2
ENSG00000164346	NSA2
ENSG00000164414	SLC35A1
ENSG00000164465	DCBLD1
ENSG00000164466	SFXN1
ENSG00000164532	TBX20
ENSG00000164543	STK17A
ENSG00000164576	SAP30L
ENSG00000164597	COG5
ENSG00000164631	ZNF12
ENSG00000164659	ELAPOR2
ENSG00000164663	USP49
ENSG00000164683	HEY1
ENSG00000164715	LMTK2
ENSG00000164741	DLC1
ENSG00000164742	ADCY1
ENSG00000164751	PEX2
ENSG00000164830	OXR1
ENSG00000164902	PHAX
ENSG00000164924	YWHAZ
ENSG00000164929	BAALC
ENSG00000164933	SLC25A32
ENSG00000164934	DCAF13
ENSG00000164985	PSIP1
ENSG00000165055	METTL2B
ENSG00000165060	FXN
ENSG00000165061	ZMAT4
ENSG00000165097	KDM1B
ENSG00000165102	HGSNAT
ENSG00000165152	PGAP4
ENSG00000165209	STRBP
ENSG00000165219	GAPVD1
ENSG00000165259	HDX
ENSG00000165282	PIGO
ENSG00000165288	BRWD3
ENSG00000165300	SLITRK5
ENSG00000165389	SPTSSA
ENSG00000165410	CFL2
ENSG00000165434	PGM2L1
ENSG00000165476	REEP3
ENSG00000165494	PCF11
ENSG00000165521	EML5
ENSG00000165646	SLC18A2
ENSG00000165655	ZNF503
ENSG00000165661	QSOX2
ENSG00000165671	NSD1
ENSG00000165678	GHITM
ENSG00000165688	PMPCA
ENSG00000165699	TSC1
ENSG00000165704	HPRT1
ENSG00000165731	RET
ENSG00000165732	DDX21
ENSG00000165733	BMS1
ENSG00000165813	CCDC186
ENSG00000165832	TRUB1
ENSG00000165891	E2F7
ENSG00000165997	ARL5B
ENSG00000166025	AMOTL1
ENSG00000166068	SPRED1
ENSG00000166123	GPT2
ENSG00000166128	RAB8B
ENSG00000166130	IKBIP
ENSG00000166133	RPUSD2
ENSG00000166206	GABRB3
ENSG00000166266	CUL5
ENSG00000166402	TUB
ENSG00000166450	PRTG
ENSG00000166454	ATMIN
ENSG00000166479	TMX3
ENSG00000166503	HDGFL3
ENSG00000166575	TMEM135
ENSG00000166747	AP1G1
ENSG00000166821	PEX11A
ENSG00000166839	ANKDD1A
ENSG00000166847	DCTN5
ENSG00000166855	CLPX
ENSG00000166889	PATL1
ENSG00000166908	PIP4K2C
ENSG00000166922	SCG5
ENSG00000166965	RCCD1
ENSG00000166974	MAPRE2
ENSG00000167005	NUDT21
ENSG00000167081	PBX3
ENSG00000167088	SNRPD1
ENSG00000167491	GATAD2A
ENSG00000167635	ZNF146
ENSG00000167695	TLCD3A
ENSG00000167904	TMEM68
ENSG00000167996	FTH1
ENSG00000168036	CTNNB1
ENSG00000168066	SF1
ENSG00000168078	PBK
ENSG00000168116	KIAA1586
ENSG00000168118	RAB4A
ENSG00000168137	SETD5
ENSG00000168175	MAPK1IP1L
ENSG00000168243	GNG4
ENSG00000168264	IRF2BP2
ENSG00000168283	BMI1
ENSG00000168385	SEPTIN2
ENSG00000168397	ATG4B
ENSG00000168487	BMP1
ENSG00000168538	TRAPPC11
ENSG00000168575	SLC20A2
ENSG00000168591	TMUB2
ENSG00000168610	STAT3
ENSG00000168621	GDNF
ENSG00000168765	GSTM4
ENSG00000168803	ADAL
ENSG00000168818	STX18
ENSG00000168830	HTR1E
ENSG00000168924	LETM1
ENSG00000168944	CEP120
ENSG00000168958	MFF
ENSG00000169045	HNRNPH1
ENSG00000169062	UPF3A
ENSG00000169116	PARM1
ENSG00000169118	CSNK1G1
ENSG00000169139	UBE2V2
ENSG00000169193	CCDC126
ENSG00000169251	NMD3
ENSG00000169299	PGM2
ENSG00000169330	MINAR1
ENSG00000169379	ARL13B
ENSG00000169436	COL22A1
ENSG00000169439	SDC2
ENSG00000169446	MMGT1
ENSG00000169604	ANTXR1
ENSG00000169684	CHRNA5
ENSG00000169762	TAPT1
ENSG00000169783	LINGO1
ENSG00000169826	CSGALNACT2
ENSG00000169895	SYAP1
ENSG00000169967	MAP3K2
ENSG00000169981	ZNF35
ENSG00000170011	MYRIP
ENSG00000170113	NIPA1
ENSG00000170248	PDCD6IP
ENSG00000170270	GON7
ENSG00000170322	NFRKB
ENSG00000170348	TMED10
ENSG00000170381	SEMA3E
ENSG00000170385	SLC30A1
ENSG00000170419	VSTM2A
ENSG00000170448	NFXL1
ENSG00000170464	DNAJC18
ENSG00000170515	PA2G4
ENSG00000170522	ELOVL6
ENSG00000170606	HSPA4
ENSG00000170632	ARMC10
ENSG00000170638	TRABD
ENSG00000170779	CDCA4
ENSG00000170791	CHCHD7
ENSG00000170837	GPR27
ENSG00000170852	KBTBD2
ENSG00000170854	RIOX2
ENSG00000170873	MTSS1
ENSG00000170946	DNAJC24
ENSG00000171033	PKIA
ENSG00000171056	SOX7
ENSG00000171094	ALK
ENSG00000171105	INSR
ENSG00000171132	PRKCE
ENSG00000171206	TRIM8
ENSG00000171241	SHCBP1
ENSG00000171303	KCNK3
ENSG00000171310	CHST11
ENSG00000171365	CLCN5
ENSG00000171444	MCC
ENSG00000171448	ZBTB26
ENSG00000171469	ZNF561
ENSG00000171475	WIPF2
ENSG00000171488	LRRC8C
ENSG00000171490	RSL1D1
ENSG00000171497	PPID
ENSG00000171517	LPAR3
ENSG00000171603	CLSTN1
ENSG00000171612	SLC25A33
ENSG00000171649	ZIK1
ENSG00000171681	ATF7IP
ENSG00000171757	LRRC34
ENSG00000171791	BCL2
ENSG00000171817	ZNF540
ENSG00000171877	FRMD5
ENSG00000171914	TLN2
ENSG00000171988	JMJD1C
ENSG00000172292	CERS6
ENSG00000172380	GNG12
ENSG00000172466	ZNF24
ENSG00000172765	TMCC1
ENSG00000172817	CYP7B1
ENSG00000172840	PDP2
ENSG00000172869	DMXL1
ENSG00000172878	METAP1D
ENSG00000172915	NBEA
ENSG00000172986	GXYLT2
ENSG00000173145	NOC3L
ENSG00000173208	ABCD2
ENSG00000173230	GOLGB1
ENSG00000173542	MOB1B
ENSG00000173598	NUDT4
ENSG00000173674	EIF1AX
ENSG00000173698	ADGRG2
ENSG00000173726	TOMM20
ENSG00000173848	NET1
ENSG00000173852	DPY19L1
ENSG00000173889	PHC3
ENSG00000173898	SPTBN2
ENSG00000174136	RGMB
ENSG00000174238	PITPNA
ENSG00000174306	ZHX3
ENSG00000174373	RALGAPA1
ENSG00000174437	ATP2A2
ENSG00000174516	PELI3
ENSG00000174574	AKIRIN1
ENSG00000174599	TRAM1L1
ENSG00000174738	NR1D2
ENSG00000174748	RPL15
ENSG00000174780	SRP72
ENSG00000174891	RSRC1
ENSG00000174928	C3orf33
ENSG00000174953	DHX36
ENSG00000174989	FBXW8
ENSG00000175040	CHST2
ENSG00000175048	ZDHHC14
ENSG00000175104	TRAF6
ENSG00000175175	PPM1E
ENSG00000175348	TMEM9B
ENSG00000175387	SMAD2
ENSG00000175582	RAB6A
ENSG00000175662	TOM1L2
ENSG00000175764	TTLL11
ENSG00000175879	HOXD8
ENSG00000176108	CHMP6
ENSG00000176142	TMEM39A
ENSG00000176209	SMIM19
ENSG00000176463	SLCO3A1
ENSG00000176623	RMDN1
ENSG00000176624	MEX3C
ENSG00000176641	RNF152
ENSG00000176728	TTTY14
ENSG00000176749	CDK5R1
ENSG00000176853	FAM91A1
ENSG00000176915	ANKLE2
ENSG00000176953	NFATC2IP
ENSG00000177000	MTHFR
ENSG00000177082	WDR73
ENSG00000177189	RPS6KA3
ENSG00000177200	CHD9
ENSG00000177302	TOP3A
ENSG00000177311	ZBTB38
ENSG00000177463	NR2C2
ENSG00000177479	ARIH2
ENSG00000177511	ST8SIA3
ENSG00000177565	TBL1XR1
ENSG00000177613	CSTF2T
ENSG00000177733	HNRNPA0
ENSG00000177885	GRB2
ENSG00000178053	MLF1
ENSG00000178662	CSRNP3
ENSG00000178694	NSUN3
ENSG00000178695	KCTD12
ENSG00000179029	TMEM107
ENSG00000179051	RCC2
ENSG00000179152	TCAIM
ENSG00000179295	PTPN11
ENSG00000179331	RAB39A
ENSG00000179335	CLK3
ENSG00000179348	GATA2
ENSG00000179364	PACS2
ENSG00000179588	ZFPM1
ENSG00000179889	PDXDC1
ENSG00000179915	NRXN1
ENSG00000179981	TSHZ1
ENSG00000180035	ZNF48
ENSG00000180228	PRKRA
ENSG00000180233	ZNRF2
ENSG00000180488	MIGA1
ENSG00000180573	H2AC6
ENSG00000180628	PCGF5
ENSG00000180884	ZNF792
ENSG00000181090	EHMT1
ENSG00000181191	PJA1
ENSG00000181264	TLCD5
ENSG00000181588	MEX3D
ENSG00000181704	YIPF6
ENSG00000181751	MACIR
ENSG00000181852	RNF41
ENSG00000181904	C5orf24
ENSG00000181915	ADO
ENSG00000181938	GINS3
ENSG00000182108	DEXI
ENSG00000182224	CYB5D1
ENSG00000182481	KPNA2
ENSG00000182606	TRAK1
ENSG00000182827	ACBD3
ENSG00000182831	C16orf72
ENSG00000182836	PLCXD3
ENSG00000182916	TCEAL7
ENSG00000182952	HMGN4
ENSG00000182963	GJC1
ENSG00000183049	CAMK1D
ENSG00000183098	GPC6
ENSG00000183291	SELENOF
ENSG00000183307	TMEM121B
ENSG00000183309	ZNF623
ENSG00000183495	EP400
ENSG00000183513	COA5
ENSG00000183576	SETD3
ENSG00000183624	HMCES
ENSG00000183688	RFLNB
ENSG00000183726	TMEM50A
ENSG00000183850	ZNF730
ENSG00000183891	TTC32
ENSG00000183955	KMT5A
ENSG00000184178	SCFD2
ENSG00000184194	GPR173
ENSG00000184347	SLIT3
ENSG00000184384	MAML2
ENSG00000184402	SS18L1
ENSG00000184432	COPB2
ENSG00000184500	PROS1
ENSG00000184545	DUSP8
ENSG00000184575	XPOT
ENSG00000184661	CDCA2
ENSG00000184708	EIF4ENIF1
ENSG00000184900	SUMO3
ENSG00000185009	AP3M1
ENSG00000185049	NELFA
ENSG00000185115	NSMCE3
ENSG00000185222	TCEAL9
ENSG00000185252	ZNF74
ENSG00000185344	ATP6V0A2
ENSG00000185414	MRPL30
ENSG00000185418	TARS3
ENSG00000185565	LSAMP
ENSG00000185619	PCGF3
ENSG00000185651	UBE2L3
ENSG00000185684	EP400P1
ENSG00000185737	NRG3
ENSG00000185753	CXorf38
ENSG00000185920	PTCH1
ENSG00000185947	ZNF267
ENSG00000186026	ZNF284
ENSG00000186106	ANKRD46
ENSG00000186130	ZBTB6
ENSG00000186222	BLOC1S4
ENSG00000186230	ZNF749
ENSG00000186469	GNG2
ENSG00000186480	INSIG1
ENSG00000186591	UBE2H
ENSG00000186687	LYRM7
ENSG00000186812	ZNF397
ENSG00000186834	HEXIM1
ENSG00000186908	ZDHHC17
ENSG00000187239	FNBP1
ENSG00000187257	RSBN1L
ENSG00000187742	SECISBP2
ENSG00000187764	SEMA4D
ENSG00000188021	UBQLN2
ENSG00000188112	C6orf132
ENSG00000188177	ZC3H6
ENSG00000188215	DCUN1D3
ENSG00000188343	CIBAR1
ENSG00000188419	CHM
ENSG00000188428	BLOC1S5
ENSG00000188582	PAQR9
ENSG00000188612	SUMO2
ENSG00000188613	NANOS1
ENSG00000188641	DPYD
ENSG00000188647	PTAR1
ENSG00000188690	UROS
ENSG00000188706	ZDHHC9
ENSG00000188735	TMEM120B
ENSG00000188811	NHLRC3
ENSG00000188848	BEND4
ENSG00000188859	FAM78B
ENSG00000189079	ARID2
ENSG00000189091	SF3B3
ENSG00000189159	JPT1
ENSG00000189180	ZNF33A
ENSG00000189184	PCDH18
ENSG00000189376	C8orf76
ENSG00000196072	BLOC1S2
ENSG00000196159	FAT4
ENSG00000196323	ZBTB44
ENSG00000196352	CD55
ENSG00000196353	CPNE4
ENSG00000196363	WDR5
ENSG00000196368	NUDT11
ENSG00000196371	FUT4
ENSG00000196418	ZNF124
ENSG00000196421	C20orf204
ENSG00000196437	ZNF569
ENSG00000196455	PIK3R4
ENSG00000196459	TRAPPC2
ENSG00000196470	SIAH1
ENSG00000196482	ESRRG
ENSG00000196636	SDHAF3
ENSG00000196693	ZNF33B
ENSG00000196715	VKORC1L1
ENSG00000196730	DAPK1
ENSG00000196776	CD47
ENSG00000196914	ARHGEF12
ENSG00000196935	SRGAP1
ENSG00000196937	FAM3C
ENSG00000197006	METTL9
ENSG00000197045	GMFB
ENSG00000197056	ZMYM1
ENSG00000197217	ENTPD4
ENSG00000197296	FITM2
ENSG00000197321	SVIL
ENSG00000197372	ZNF675
ENSG00000197381	ADARB1
ENSG00000197386	HTT
ENSG00000197535	MYO5A
ENSG00000197555	SIPA1L1
ENSG00000197622	CDC42SE1
ENSG00000197771	MCMBP
ENSG00000197780	TAF13
ENSG00000197860	SGTB
ENSG00000197894	ADH5
ENSG00000197930	ERO1A
ENSG00000197951	ZNF71
ENSG00000197965	MPZL1
ENSG00000198028	ZNF560
ENSG00000198087	CD2AP
ENSG00000198162	MAN1A2
ENSG00000198168	SVIP
ENSG00000198218	QRICH1
ENSG00000198301	SDAD1
ENSG00000198435	NRARP
ENSG00000198455	ZXDB
ENSG00000198478	SH3BGRL2
ENSG00000198498	TMA16
ENSG00000198589	LRBA
ENSG00000198612	COPS8
ENSG00000198625	MDM4
ENSG00000198648	STK39
ENSG00000198673	TAFA2
ENSG00000198700	IPO9
ENSG00000198715	GLMP
ENSG00000198728	LDB1
ENSG00000198740	ZNF652
ENSG00000198783	ZNF830
ENSG00000198791	CNOT7
ENSG00000198799	LRIG2
ENSG00000198815	FOXJ3
ENSG00000198825	INPP5F
ENSG00000198826	ARHGAP11A
ENSG00000198830	HMGN2
ENSG00000198860	TSEN15
ENSG00000198862	LTN1
ENSG00000198873	GRK5
ENSG00000198885	ITPRIPL1
ENSG00000198887	SMC5
ENSG00000198890	PRMT6
ENSG00000198894	CIPC
ENSG00000198964	SGMS1
ENSG00000203644	AC083799.1
ENSG00000203667	COX20
ENSG00000203705	TATDN3
ENSG00000203791	EEF1AKMT2
ENSG00000203867	RBM20
ENSG00000203880	PCMTD2
ENSG00000204070	SYS1
ENSG00000204178	MACO1
ENSG00000204217	BMPR2
ENSG00000204272	NBDY
ENSG00000204852	TCTN1
ENSG00000204899	MZT1
ENSG00000204970	PCDHA1
ENSG00000204977	TRIM13
ENSG00000205268	PDE7A
ENSG00000205339	IPO7
ENSG00000205423	CNEP1R1
ENSG00000205683	DPF3
ENSG00000205981	DNAJC19
ENSG00000206053	JPT2
ENSG00000206199	ANKUB1
ENSG00000206560	ANKRD28
ENSG00000211456	SACM1L
ENSG00000211460	TSN
ENSG00000212747	RTL8B
ENSG00000213064	SFT2D2
ENSG00000213066	CEP43
ENSG00000213139	CRYGS
ENSG00000213190	MLLT11
ENSG00000213246	SUPT4H1
ENSG00000213918	DNASE1
ENSG00000213923	CSNK1E
ENSG00000213949	ITGA1
ENSG00000214413	BBIP1
ENSG00000214455	RCN1P2
ENSG00000214548	MEG3
ENSG00000214944	ARHGEF28
ENSG00000215386	MIR99AHG
ENSG00000215612	HMX1
ENSG00000215712	TMEM242
ENSG00000215717	TMEM167B
ENSG00000216895	AC009403.1
ENSG00000218336	TENM3
ENSG00000218739	CEBPZOS
ENSG00000219545	UMAD1
ENSG00000221914	PPP2R2A
ENSG00000223496	EXOSC6
ENSG00000224078	SNHG14
ENSG00000224470	ATXN1L
ENSG00000224531	SMIM13
ENSG00000225484	NUTM2B-AS1
ENSG00000225733	FGD5-AS1
ENSG00000225746	MEG8
ENSG00000225921	NOL7
ENSG00000226278	PSPHP1
ENSG00000226479	TMEM185B
ENSG00000227354	RBM26-AS1
ENSG00000228144	AC078927.1
ENSG00000228630	HOTAIR
ENSG00000228794	LINC01128
ENSG00000230551	AC021078.1
ENSG00000231887	PRH1
ENSG00000231896	AC019185.1
ENSG00000232216	IGHV3-43
ENSG00000232593	KANTR
ENSG00000233080	LINC01399
ENSG00000239264	TXNDC5
ENSG00000239305	RNF103
ENSG00000240694	PNMA2
ENSG00000241472	PTPRG-AS1
ENSG00000241878	PISD
ENSG00000243155	AL162431.1
ENSG00000243797	AC004917.1
ENSG00000243960	AL390195.1
ENSG00000244300	GATA2-AS1
ENSG00000244754	N4BP2L2
ENSG00000245680	ZNF585B
ENSG00000247134	AC090204.1
ENSG00000248710	AC079594.2
ENSG00000249624	AP000295.1
ENSG00000250049	AC114316.1
ENSG00000251216	AC106895.2
ENSG00000253250	C8orf88
ENSG00000253457	SMIM18
ENSG00000255302	EID1
ENSG00000255529	POLR2M
ENSG00000255571	MIR9-3HG
ENSG00000255767	NA
ENSG00000256861	AC048338.1
ENSG00000259546	AC027808.1
[truncated: 40 more rows]

## Sheet: TableS2B
ensembl_gene_id	external_gene_name
ENSG00000006607	FARP2
ENSG00000012048	BRCA1
ENSG00000025800	KPNA6
ENSG00000029993	HMGB3
ENSG00000040341	STAU2
ENSG00000044459	CNTLN
ENSG00000048052	HDAC9
ENSG00000049769	PPP1R3F
ENSG00000050628	PTGER3
ENSG00000054523	KIF1B
ENSG00000059728	MXD1
ENSG00000063587	ZNF275
ENSG00000065559	MAP2K4
ENSG00000066777	ARFGEF1
ENSG00000070770	CSNK2A2
ENSG00000072501	SMC1A
ENSG00000072518	MARK2
ENSG00000075790	BCAP29
ENSG00000080823	MOK
ENSG00000080986	NDC80
ENSG00000082497	SERTAD4
ENSG00000084092	NOA1
ENSG00000087152	ATXN7L3
ENSG00000088448	ANKRD10
ENSG00000089775	ZBTB25
ENSG00000090932	DLL3
ENSG00000092978	GPATCH2
ENSG00000102100	SLC35A2
ENSG00000102900	NUP93
ENSG00000106244	PDAP1
ENSG00000108384	RAD51C
ENSG00000108960	MMD
ENSG00000109255	NMU
ENSG00000109670	FBXW7
ENSG00000110429	FBXO3
ENSG00000112200	ZNF451
ENSG00000112320	SOBP
ENSG00000113272	THG1L
ENSG00000113761	ZNF346
ENSG00000114098	ARMC8
ENSG00000114315	HES1
ENSG00000115290	GRB14
ENSG00000115297	TLX2
ENSG00000115419	GLS
ENSG00000116035	VAX2
ENSG00000116678	LEPR
ENSG00000116983	HPCAL4
ENSG00000117385	P3H1
ENSG00000118898	PPL
ENSG00000119866	BCL11A
ENSG00000119965	C10orf88
ENSG00000120254	MTHFD1L
ENSG00000120334	CENPL
ENSG00000122254	HS3ST2
ENSG00000123552	USP45
ENSG00000125779	PANK2
ENSG00000127511	SIN3B
ENSG00000130024	PHF10
ENSG00000132478	UNK
ENSG00000134318	ROCK2
ENSG00000134779	TPGS2
ENSG00000135298	ADGRB3
ENSG00000135521	LTV1
ENSG00000135596	MICAL1
ENSG00000135801	TAF5L
ENSG00000136877	FPGS
ENSG00000137054	POLR1E
ENSG00000137504	CREBZF
ENSG00000137936	BCAR3
ENSG00000138071	ACTR2
ENSG00000138688	KIAA1109
ENSG00000138780	GSTCD
ENSG00000139352	ASCL1
ENSG00000140471	LINS1
ENSG00000141084	RANBP10
ENSG00000141179	PCTP
ENSG00000143443	C1orf56
ENSG00000143486	EIF2D
ENSG00000147316	MCPH1
ENSG00000147383	NSDHL
ENSG00000148950	IMMP1L
ENSG00000151466	SCLT1
ENSG00000151746	BICD1
ENSG00000152291	TGOLN2
ENSG00000152518	ZFP36L2
ENSG00000152578	GRIA4
ENSG00000153207	AHCTF1
ENSG00000154654	NCAM2
ENSG00000154767	XPC
ENSG00000156983	BRPF1
ENSG00000157168	NRG1
ENSG00000158560	DYNC1I1
ENSG00000159131	GART
ENSG00000160325	CACFD1
ENSG00000161912	ADCY10P1
ENSG00000163138	PACRGL
ENSG00000164944	VIRMA
ENSG00000165449	SLC16A9
ENSG00000166173	LARP6
ENSG00000166685	COG1
ENSG00000167460	TPM4
ENSG00000168032	ENTPD3
ENSG00000168303	MPLKIP
ENSG00000170234	PWWP2A
ENSG00000171044	XKR6
ENSG00000171316	CHD7
ENSG00000171862	PTEN
ENSG00000172046	USP19
ENSG00000173588	CEP83
ENSG00000173914	RBM4B
ENSG00000174456	C12orf76
ENSG00000177981	ASB8
ENSG00000178691	SUZ12
ENSG00000179008	C14orf39
ENSG00000182287	AP1S2
ENSG00000182473	EXOC7
ENSG00000183354	KIAA2026
ENSG00000185716	MOSMO
ENSG00000185798	WDR53
ENSG00000186660	ZFP91
ENSG00000187522	HSPA14
ENSG00000197062	ZSCAN26
ENSG00000197275	RAD54B
ENSG00000197343	ZNF655
ENSG00000197928	ZNF677
ENSG00000198353	HOXC4
ENSG00000198363	ASPH
ENSG00000198399	ITSN2
ENSG00000198879	SFMBT2
ENSG00000203965	EFCAB7
ENSG00000204271	SPIN3
ENSG00000215472	RPL17-C18orf32
ENSG00000218175	AC016739.1
ENSG00000219481	NBPF1
ENSG00000230590	FTX
ENSG00000235560	AC002310.1
ENSG00000237125	HAND2-AS1
ENSG00000237380	HOXD-AS2
ENSG00000237435	LINC02790
ENSG00000240230	COX19
ENSG00000241127	YAE1
ENSG00000243927	MRPS6
ENSG00000244026	FAM86DP
ENSG00000247572	CKMT2-AS1
ENSG00000249936	RAC1P2
ENSG00000254673	AC110275.1
ENSG00000267360	AC012309.1
ENSG00000267552	AC093227.2
ENSG00000268205	AC005261.1
ENSG00000270532	PEBP1P2
ENSG00000271793	AL589666.1
ENSG00000272168	CASC15
ENSG00000275052	PPP4R3B
ENSG00000277443	MARCKS
ENSG00000279095	AC243964.4
ENSG00000282278	AC058822.1

## Sheet: TableS2C
ensembl_gene_id	external_gene_name
ENSG00000000003	TSPAN6
ENSG00000001461	NIPAL3
ENSG00000005108	THSD7A
ENSG00000006125	AP2B1
ENSG00000006459	KDM7A
ENSG00000006468	ETV1
ENSG00000006652	IFRD1
ENSG00000006715	VPS41
ENSG00000007168	PAFAH1B1
ENSG00000008277	ADAM22
ENSG00000008294	SPAG9
ENSG00000010017	RANBP9
ENSG00000011007	ELOA
ENSG00000011465	DCN
ENSG00000013293	SLC7A14
ENSG00000017260	ATP2C1
ENSG00000021776	AQR
ENSG00000023516	AKAP11
ENSG00000025770	NCAPH2
ENSG00000029363	BCLAF1
ENSG00000030066	NUP160
ENSG00000031003	FAM13B
ENSG00000033030	ZCCHC8
ENSG00000033800	PIAS1
ENSG00000035499	DEPDC1B
ENSG00000038382	TRIO
ENSG00000040933	INPP4A
ENSG00000042088	TDP1
ENSG00000047188	YTHDC2
ENSG00000047346	FAM214A
ENSG00000048649	RSF1
ENSG00000050748	MAPK9
ENSG00000054118	THRAP3
ENSG00000054267	ARID4B
ENSG00000055332	EIF2AK2
ENSG00000055917	PUM2
ENSG00000056586	RC3H2
ENSG00000057663	ATG5
ENSG00000058600	POLR3E
ENSG00000058804	NDC1
ENSG00000059145	UNKL
ENSG00000059769	DNAJC25
ENSG00000060709	RIMBP2
ENSG00000060749	QSER1
ENSG00000061794	MRPS35
ENSG00000064651	SLC12A2
ENSG00000065328	MCM10
ENSG00000065809	FAM107B
ENSG00000066084	DIP2B
ENSG00000066583	ISOC1
ENSG00000066739	ATG2B
ENSG00000066855	MTFR1
ENSG00000067167	TRAM1
ENSG00000067533	RRP15
ENSG00000067955	CBFB
ENSG00000068305	MEF2A
ENSG00000068438	FTSJ1
ENSG00000069248	NUP133
ENSG00000069509	FUNDC1
ENSG00000069869	NEDD4
ENSG00000070423	RNF126
ENSG00000070882	OSBPL3
ENSG00000071054	MAP4K4
ENSG00000071189	SNX13
ENSG00000072415	MPP5
ENSG00000073614	KDM5A
ENSG00000073712	FERMT2
ENSG00000074603	DPP8
ENSG00000074695	LMAN1
ENSG00000075413	MARK3
ENSG00000075420	FNDC3B
ENSG00000076108	BAZ2A
ENSG00000077721	UBE2A
ENSG00000078018	MAP2
ENSG00000078124	ACER3
ENSG00000078140	UBE2K
ENSG00000078369	GNB1
ENSG00000080371	RAB21
ENSG00000080815	PSEN1
ENSG00000081154	PCNP
ENSG00000082258	CCNT2
ENSG00000083642	PDS5B
ENSG00000083720	OXCT1
ENSG00000084234	APLP2
ENSG00000085415	SEH1L
ENSG00000085563	ABCB1
ENSG00000085733	CTTN
ENSG00000087448	KLHL42
ENSG00000087586	AURKA
ENSG00000088247	KHSRP
ENSG00000090615	GOLGA3
ENSG00000090905	TNRC6A
ENSG00000091527	CDV3
ENSG00000092140	G2E3
ENSG00000092421	SEMA6A
ENSG00000092853	CLSPN
ENSG00000093000	NUP50
ENSG00000093144	ECHDC1
ENSG00000093167	LRRFIP2
ENSG00000093183	SEC22C
ENSG00000095209	TMEM38B
ENSG00000095787	WAC
ENSG00000096092	TMEM14A
ENSG00000096746	HNRNPH3
ENSG00000097033	SH3GLB1
ENSG00000097046	CDC7
ENSG00000099995	SF3A1
ENSG00000100030	MAPK1
ENSG00000100077	GRK3
ENSG00000100154	TTC28
ENSG00000100345	MYH9
ENSG00000100354	TNRC6B
ENSG00000100596	SPTLC2
ENSG00000100650	SRSF5
ENSG00000100664	EIF5
ENSG00000100731	PCNX1
ENSG00000100796	PPP4R3A
ENSG00000100852	ARHGAP5
ENSG00000100916	BRMS1L
ENSG00000101144	BMP7
ENSG00000101290	CDS2
ENSG00000101343	CRNKL1
ENSG00000101574	METTL4
ENSG00000101654	RNMT
ENSG00000101844	ATG4A
ENSG00000101974	ATP11C
ENSG00000103018	CYB5B
ENSG00000103061	SLC7A6OS
ENSG00000103064	SLC7A6
ENSG00000103091	WDR59
ENSG00000103353	UBFD1
ENSG00000103365	GGA2
ENSG00000103479	RBL2
ENSG00000103591	AAGAB
ENSG00000103769	RAB11A
ENSG00000104067	TJP1
ENSG00000104219	ZDHHC2
ENSG00000104228	TRIM35
ENSG00000104313	EYA1
ENSG00000104320	NBN
ENSG00000104356	POP1
ENSG00000104388	RAB2A
ENSG00000104427	ZC2HC1A
ENSG00000104497	SNX16
ENSG00000104643	MTMR9
ENSG00000104660	LEPROTL1
ENSG00000104904	OAZ1
ENSG00000104964	TLE5
ENSG00000105323	HNRNPUL1
ENSG00000105778	AVL9
ENSG00000105829	BET1
ENSG00000105968	H2AZ2
ENSG00000106692	FKTN
ENSG00000107341	UBE2R2
ENSG00000107372	ZFAND5
ENSG00000107643	MAPK8
ENSG00000107779	BMPR1A
ENSG00000107949	BCCIP
ENSG00000108018	SORCS1
ENSG00000108176	DNAJC12
ENSG00000108239	TBC1D12
ENSG00000108370	RGS9
ENSG00000108443	RPS6KB1
ENSG00000108510	MED13
ENSG00000108582	CPD
ENSG00000108946	PRKAR1A
ENSG00000109118	PHF12
ENSG00000109133	TMEM33
ENSG00000109171	SLAIN2
ENSG00000109436	TBC1D9
ENSG00000109519	GRPEL1
ENSG00000109572	CLCN3
ENSG00000109685	NSD2
ENSG00000109787	KLF3
ENSG00000109991	P2RX3
ENSG00000110906	KCTD10
ENSG00000110911	SLC11A2
ENSG00000110917	MLEC
ENSG00000111266	DUSP16
ENSG00000111412	C12orf49
ENSG00000111615	KRR1
ENSG00000111647	UHRF1BP1L
ENSG00000111785	RIC8B
ENSG00000111790	FGFR1OP2
ENSG00000111911	HINT3
ENSG00000112038	OPRM1
ENSG00000112146	FBXO9
ENSG00000112245	PTP4A1
ENSG00000112294	ALDH5A1
ENSG00000112697	TMEM30A
ENSG00000112852	PCDHB2
ENSG00000112893	MAN2A1
ENSG00000113248	PCDHB15
ENSG00000113327	GABRG2
ENSG00000113441	LNPEP
ENSG00000113456	RAD1
ENSG00000113649	TCERG1
ENSG00000113657	DPYSL3
ENSG00000113739	STC2
ENSG00000114331	ACAP2
ENSG00000114423	CBLB
ENSG00000114439	BBX
ENSG00000114503	NCBP2
ENSG00000114554	PLXNA1
ENSG00000114744	COMMD2
ENSG00000115295	CLIP4
ENSG00000115355	CCDC88A
ENSG00000115425	PECR
ENSG00000115540	MOB4
ENSG00000115904	SOS1
ENSG00000115966	ATF2
ENSG00000116005	PCYOX1
ENSG00000116138	DNAJC16
ENSG00000116198	CEP104
ENSG00000116209	TMEM59
ENSG00000116251	RPL22
ENSG00000116604	MEF2D
ENSG00000116747	RO60
ENSG00000117114	ADGRL2
ENSG00000117155	SSX2IP
ENSG00000117481	NSUN4
ENSG00000117500	TMED5
ENSG00000117505	DR1
ENSG00000117533	VAMP4
ENSG00000117592	PRDX6
ENSG00000117614	SYF2
ENSG00000117625	RCOR3
ENSG00000117868	ESYT2
ENSG00000118007	STAG1
ENSG00000118257	NRP2
ENSG00000118418	HMGN3
ENSG00000118579	MED28
ENSG00000118655	DCLRE1B
ENSG00000118733	OLFM3
ENSG00000119314	PTBP3
ENSG00000119402	FBXW2
ENSG00000119446	RBM18
ENSG00000119969	HELLS
ENSG00000120053	GOT1
ENSG00000120137	PANK3
ENSG00000120265	PCMT1
ENSG00000120327	PCDHB14
ENSG00000120705	ETF1
ENSG00000120742	SERP1
ENSG00000120925	RNF170
ENSG00000120942	UBIAD1
ENSG00000121005	CRISPLD1
ENSG00000121039	RDH10
ENSG00000121481	RNF2
ENSG00000121579	NAA50
ENSG00000121749	TBC1D15
ENSG00000121774	KHDRBS1
ENSG00000121864	ZNF639
ENSG00000122490	SLC66A2
ENSG00000122565	CBX3
ENSG00000122778	KIAA1549
ENSG00000122958	VPS26A
ENSG00000122966	CIT
ENSG00000123104	ITPR2
ENSG00000123213	NLN
ENSG00000123268	ATF1
ENSG00000123472	ATPAF1
ENSG00000123575	FAM199X
ENSG00000123739	PLA2G12A
ENSG00000124193	SRSF6
ENSG00000124198	ARFGEF2
ENSG00000124226	RNF114
ENSG00000124444	ZNF576
ENSG00000124571	XPO5
ENSG00000125266	EFNB2
ENSG00000125375	DMAC2L
ENSG00000125812	GZF1
ENSG00000125827	TMX4
ENSG00000125863	MKKS
ENSG00000126226	PCID2
ENSG00000126464	PRR12
ENSG00000127463	EMC1
ENSG00000127603	MACF1
ENSG00000128536	CDHR3
ENSG00000128585	MKLN1
ENSG00000128609	NDUFA5
ENSG00000128641	MYO1B
ENSG00000128989	ARPP19
ENSG00000129003	VPS13C
ENSG00000129128	SPCS3
ENSG00000129680	MAP7D3
ENSG00000131016	AKAP12
ENSG00000131051	RBM39
ENSG00000131507	NDFIP1
ENSG00000131979	GCH1
ENSG00000132341	RAN
ENSG00000132424	PNISR
ENSG00000132549	VPS13B
ENSG00000132953	XPO4
ENSG00000133028	SCO1
ENSG00000133030	MPRIP
ENSG00000133103	COG6
ENSG00000133627	ACTR3B
ENSG00000133641	C12orf29
ENSG00000133687	TMTC1
ENSG00000134001	EIF2S1
ENSG00000134057	CCNB1
ENSG00000134146	DPH6
ENSG00000134186	PRPF38B
ENSG00000134247	PTGFRN
ENSG00000134255	CEPT1
ENSG00000134265	NAPG
ENSG00000134748	PRPF38A
ENSG00000134874	DZIP1
ENSG00000134900	TPP2
ENSG00000134986	NREP
ENSG00000135002	RFK
ENSG00000135119	RNFT2
ENSG00000135486	HNRNPA1
ENSG00000135525	MAP7
ENSG00000135655	USP15
ENSG00000135766	EGLN1
ENSG00000135776	ABCB10
ENSG00000135837	CEP350
ENSG00000135862	LAMC1
ENSG00000135956	TMEM127
ENSG00000135966	TGFBRAP1
ENSG00000135974	C2orf49
ENSG00000136381	IREB2
ENSG00000136478	TEX2
ENSG00000136603	SKIL
ENSG00000136718	IMP4
ENSG00000136738	STAM
ENSG00000136828	RALGPS1
ENSG00000136935	GOLGA1
ENSG00000136936	XPA
ENSG00000136950	ARPC5L
ENSG00000137642	SORL1
ENSG00000137710	RDX
ENSG00000137776	SLTM
ENSG00000137812	KNL1
ENSG00000137996	RTCA
ENSG00000138078	PREPL
ENSG00000138162	TACC2
ENSG00000138303	ASCC1
ENSG00000138376	BARD1
ENSG00000138439	FAM117B
ENSG00000138443	ABI2
ENSG00000138613	APH1B
ENSG00000138696	BMPR1B
ENSG00000138698	RAP1GDS1
ENSG00000138758	SEPTIN11
ENSG00000138760	SCARB2
ENSG00000138767	CNOT6L
ENSG00000139132	FGD4
ENSG00000139289	PHLDA1
ENSG00000139746	RBM26
ENSG00000139990	DCAF5
ENSG00000140332	TLE3
ENSG00000140557	ST8SIA2
ENSG00000141627	DYM
ENSG00000142039	CCDC97
ENSG00000142188	TMEM50B
ENSG00000142396	ERVK3-1
ENSG00000143155	TIPRL
ENSG00000143179	UCK2
ENSG00000143337	TOR1AIP1
ENSG00000143476	DTL
ENSG00000143622	RIT1
ENSG00000143641	GALNT2
ENSG00000143751	SDE2
ENSG00000143797	MBOAT2
ENSG00000143952	VPS54
ENSG00000144278	GALNT13
ENSG00000144306	SCRN3
ENSG00000144366	GULP1
ENSG00000144451	SPAG16
ENSG00000144452	ABCA12
ENSG00000144468	RHBDD1
ENSG00000144677	CTDSPL
ENSG00000144711	IQSEC1
ENSG00000144867	SRPRB
ENSG00000144893	MED12L
ENSG00000144909	OSBPL11
ENSG00000145386	CCNA2
ENSG00000145388	METTL14
ENSG00000145414	NAF1
ENSG00000145495	MARCHF6
ENSG00000145817	YIPF5
ENSG00000145868	FBXO38
ENSG00000146243	IRAK1BP1
ENSG00000146263	MMS22L
ENSG00000146373	RNF217
ENSG00000146648	EGFR
ENSG00000146872	TLK2
ENSG00000147140	NONO
ENSG00000147364	FBXO25
ENSG00000147669	POLR2K
ENSG00000147912	FBXO10
ENSG00000148082	SHC3
ENSG00000148411	NACC2
ENSG00000149260	CAPN5
ENSG00000149313	AASDHPPT
ENSG00000149503	INCENP
ENSG00000149636	DSN1
ENSG00000151233	GXYLT1
ENSG00000151276	MAGI1
ENSG00000151292	CSNK1G3
ENSG00000151327	FAM177A1
ENSG00000152242	C18orf25
ENSG00000152503	TRIM36
ENSG00000152558	TMEM123
ENSG00000152749	GPR180
ENSG00000152767	FARP1
ENSG00000152795	HNRNPDL
ENSG00000152932	RAB3C
ENSG00000153046	CDYL
ENSG00000153140	CETN3
ENSG00000153147	SMARCA5
ENSG00000153814	JAZF1
ENSG00000153879	CEBPG
ENSG00000153944	MSI2
ENSG00000153989	NUS1
ENSG00000154059	IMPACT
ENSG00000154305	MIA3
ENSG00000154642	C21orf91
ENSG00000154645	CHODL
ENSG00000154813	DPH3
ENSG00000155097	ATP6V1C1
ENSG00000155755	TMEM237
ENSG00000155760	FZD7
ENSG00000155792	DEPTOR
ENSG00000156671	SAMD8
ENSG00000156976	EIF4A2
ENSG00000157216	SSBP3
ENSG00000157500	APPL1
ENSG00000157764	BRAF
ENSG00000158258	CLSTN2
ENSG00000158467	AHCYL2
ENSG00000158615	PPP1R15B
ENSG00000158636	EMSY
ENSG00000158711	ELK4
ENSG00000158985	CDC42SE2
ENSG00000159147	DONSON
ENSG00000159459	UBR1
ENSG00000160131	VMA21
ENSG00000160145	KALRN
ENSG00000160679	CHTOP
ENSG00000161551	ZNF577
ENSG00000162104	ADCY9
ENSG00000162368	CMPK1
ENSG00000162419	GMEB1
ENSG00000162441	LZIC
ENSG00000162545	CAMK2N1
ENSG00000162623	TYW3
ENSG00000162642	C1orf52
ENSG00000162664	ZNF326
ENSG00000162849	KIF26B
ENSG00000162980	ARL5A
ENSG00000163104	SMARCAD1
ENSG00000163251	FZD5
ENSG00000163320	CGGBP1
ENSG00000163349	HIPK1
ENSG00000163618	CADPS
ENSG00000163623	NKX6-1
ENSG00000163683	SMIM14
ENSG00000163686	ABHD6
ENSG00000163714	U2SURP
ENSG00000163938	GNL3
ENSG00000164074	ABHD18
ENSG00000164099	PRSS12
ENSG00000164114	MAP9
ENSG00000164168	TMEM184C
ENSG00000164187	LMBRD2
ENSG00000164209	SLC25A46
ENSG00000164211	STARD4
ENSG00000164244	PRRC1
ENSG00000164300	SERINC5
ENSG00000164323	CFAP97
ENSG00000164741	DLC1
ENSG00000164902	PHAX
ENSG00000165055	METTL2B
ENSG00000165102	HGSNAT
ENSG00000165209	STRBP
ENSG00000165259	HDX
ENSG00000165288	BRWD3
ENSG00000165410	CFL2
ENSG00000165434	PGM2L1
ENSG00000165476	REEP3
ENSG00000165646	SLC18A2
ENSG00000165671	NSD1
ENSG00000165731	RET
ENSG00000166123	GPT2
ENSG00000166130	IKBIP
ENSG00000166206	GABRB3
ENSG00000166266	CUL5
ENSG00000166503	HDGFL3
ENSG00000166747	AP1G1
ENSG00000166821	PEX11A
ENSG00000166839	ANKDD1A
ENSG00000166847	DCTN5
ENSG00000166855	CLPX
ENSG00000166922	SCG5
ENSG00000166965	RCCD1
ENSG00000167005	NUDT21
ENSG00000167081	PBX3
ENSG00000168078	PBK
ENSG00000168116	KIAA1586
ENSG00000168118	RAB4A
ENSG00000168397	ATG4B
ENSG00000168538	TRAPPC11
ENSG00000168924	LETM1
ENSG00000169330	MINAR1
ENSG00000169439	SDC2
ENSG00000170322	NFRKB
ENSG00000170348	TMED10
ENSG00000170381	SEMA3E
ENSG00000170385	SLC30A1
ENSG00000170791	CHCHD7
ENSG00000170837	GPR27
ENSG00000170873	MTSS1
ENSG00000171094	ALK
ENSG00000171448	ZBTB26
ENSG00000171488	LRRC8C
ENSG00000171681	ATF7IP
ENSG00000171757	LRRC34
ENSG00000172869	DMXL1
ENSG00000173208	ABCD2
ENSG00000173674	EIF1AX
ENSG00000173726	TOMM20
ENSG00000173848	NET1
ENSG00000173889	PHC3
ENSG00000173898	SPTBN2
ENSG00000174306	ZHX3
ENSG00000174599	TRAM1L1
ENSG00000174748	RPL15
ENSG00000174780	SRP72
ENSG00000175048	ZDHHC14
ENSG00000176142	TMEM39A
ENSG00000176463	SLCO3A1
ENSG00000176953	NFATC2IP
ENSG00000177200	CHD9
ENSG00000177479	ARIH2
ENSG00000177511	ST8SIA3
ENSG00000177885	GRB2
ENSG00000178053	MLF1
ENSG00000179029	TMEM107
ENSG00000179295	PTPN11
ENSG00000179331	RAB39A
ENSG00000179364	PACS2
ENSG00000180233	ZNRF2
ENSG00000180573	H2AC6
ENSG00000181264	TLCD5
ENSG00000181751	MACIR
ENSG00000181915	ADO
ENSG00000182836	PLCXD3
ENSG00000182916	TCEAL7
ENSG00000182963	GJC1
ENSG00000183098	GPC6
ENSG00000183850	ZNF730
ENSG00000184384	MAML2
ENSG00000184661	CDCA2
ENSG00000184900	SUMO3
ENSG00000185619	PCGF3
ENSG00000185920	PTCH1
ENSG00000186230	ZNF749
ENSG00000186469	GNG2
ENSG00000186480	INSIG1
ENSG00000186687	LYRM7
ENSG00000187257	RSBN1L
ENSG00000188215	DCUN1D3
ENSG00000188641	DPYD
ENSG00000188690	UROS
ENSG00000188811	NHLRC3
ENSG00000188848	BEND4
ENSG00000189184	PCDH18
ENSG00000196323	ZBTB44
ENSG00000196368	NUDT11
ENSG00000196371	FUT4
ENSG00000196418	ZNF124
ENSG00000196482	ESRRG
ENSG00000196636	SDHAF3
ENSG00000196715	VKORC1L1
ENSG00000197006	METTL9
ENSG00000197535	MYO5A
ENSG00000197771	MCMBP
ENSG00000197860	SGTB
ENSG00000197894	ADH5
ENSG00000197930	ERO1A
ENSG00000197965	MPZL1
ENSG00000198087	CD2AP
ENSG00000198168	SVIP
ENSG00000198498	TMA16
ENSG00000198862	LTN1
ENSG00000198887	SMC5
ENSG00000198964	SGMS1
ENSG00000203644	AC083799.1
ENSG00000204070	SYS1
ENSG00000204178	MACO1
ENSG00000204970	PCDHA1
ENSG00000205268	PDE7A
ENSG00000205339	IPO7
ENSG00000206560	ANKRD28
ENSG00000211460	TSN
ENSG00000213064	SFT2D2
ENSG00000213066	CEP43
ENSG00000213918	DNASE1
ENSG00000213949	ITGA1
ENSG00000215712	TMEM242
ENSG00000216895	AC009403.1
ENSG00000221914	PPP2R2A
ENSG00000224078	SNHG14
ENSG00000224470	ATXN1L
ENSG00000224531	SMIM13
ENSG00000225484	NUTM2B-AS1
ENSG00000225746	MEG8
ENSG00000227354	RBM26-AS1
ENSG00000232593	KANTR
ENSG00000239264	TXNDC5
ENSG00000240694	PNMA2
ENSG00000243155	AL162431.1
ENSG00000244754	N4BP2L2
ENSG00000250049	AC114316.1
ENSG00000251216	AC106895.2
ENSG00000253250	C8orf88
ENSG00000255529	POLR2M
ENSG00000255571	MIR9-3HG
ENSG00000255767	NA
ENSG00000256861	AC048338.1
ENSG00000260371	AC026464.3
ENSG00000260566	AC127459.1
ENSG00000261377	PDCD6IPP2
ENSG00000261824	LINC00662
ENSG00000267041	ZNF850
ENSG00000267228	AC012254.2
ENSG00000277586	NEFL
ENSG00000280571	AC006059.2
ENSG00000284461	AC027644.4

## Sheet: TableS2D
ensembl_gene_id	external_gene_name
ENSG00000029993	HMGB3
ENSG00000048052	HDAC9
ENSG00000050628	PTGER3
ENSG00000070770	CSNK2A2
ENSG00000088448	ANKRD10
ENSG00000089775	ZBTB25
ENSG00000092978	GPATCH2
ENSG00000102900	NUP93
ENSG00000112200	ZNF451
ENSG00000112320	SOBP
ENSG00000114098	ARMC8
ENSG00000115297	TLX2
ENSG00000115419	GLS
ENSG00000116035	VAX2
ENSG00000117385	P3H1
ENSG00000123552	USP45
ENSG00000125779	PANK2
ENSG00000134779	TPGS2
ENSG00000137504	CREBZF
ENSG00000140471	LINS1
ENSG00000147383	NSDHL
ENSG00000151466	SCLT1
ENSG00000151746	BICD1
ENSG00000154654	NCAM2
ENSG00000163138	PACRGL
ENSG00000165449	SLC16A9
ENSG00000173914	RBM4B
ENSG00000185716	MOSMO
ENSG00000198363	ASPH
ENSG00000204271	SPIN3
ENSG00000230590	FTX
ENSG00000247572	CKMT2-AS1
ENSG00000254673	AC110275.1
ENSG00000271793	AL589666.1
ENSG00000272168	CASC15
