# Supplementary material for: A twin UGUA motif directs the balance between gene isoforms through CFIm and the mTORC1 signaling pathway
Source: eLife. 2023 Sep 4;12:e85036. doi: 10.7554/eLife.85036 (PMC10476966; doi:10.7554/eLife.85036)
Supplement: Supplementary file 3. [file elife-85036-supp3.xlsx]

## Sheet: TableS3A
Table S3A. 6 candidate genes with CPSF6-dependent PAS harboring a UGUANUGUA motif from PAPERCLIP profiling in shCPSF6-BE2C cells.
ensembl_gene_id	external_gene_name	qvalue	Twin UGUA motif	Twin UGUA motif Location (0=cleavage site)
ENSG00000138696	BMPR1B	2.4664e-29	TGTATTGTA	-78
ENSG00000115540	MOB4	4.79046e-27	TGTACTGTA	-42
ENSG00000112038	OPRM1	1.55389e-16	TGTATTGTA	-72
ENSG00000108018	SORCS1	3.52715e-12	TGTAGTGTA	-70
ENSG00000165671	NSD1	4.71021e-09	TGTACTGTA	-64
ENSG00000128585	MKLN1	1.99373e-07	TGTAATGTA	-68

## Sheet: TableS3B
Table S3B. Experimentally tested twin-UGUA containing human PASs.
Name/Gene	Twin-UGUA motif sequence	Additional UGUA motifs?	Conserved in mouse?	Location (0=clevage site)	Canonical PA signal?	PAS usage with mutant twin-UGUA motif in WT cells	PAS usage of wildtype reporter in CKO cells	Relevant Figure
TRIM9-S	TGTACTGTA	Yes	Yes	-174	Yes (AATAAA)	73% decrease	51% decrease	Fig. 4
MOB4, distal	TGTACTGTA	No	No	-42	No (ATAAAA)	63% decrease	42% decrease	Fig. 5
BMPR1B, distal	TGTATTGTA	Yes	No	-78	Yes (AATAAA)	19% decrease	22% decrease	Fig. 5
BRD4-L	TGTACTGTA	Yes	No	-181	Yes (AATAAA)	32% decrease	22% decrease	Fig. 6
