# Supplementary material for: A twin UGUA motif directs the balance between gene isoforms through CFIm and the mTORC1 signaling pathway
Source: eLife. 2023 Sep 4;12:e85036. doi: 10.7554/eLife.85036 (PMC10476966; doi:10.7554/eLife.85036)
Supplement: Supplementary file 4. [file elife-85036-supp4.xlsx]

## Sheet: TableS4A_qPCR_Primers
Table S4A. List of primers
Primer Sequence (5' to 3')	Description
CTCAGCCGCCATCTTCACCC	Trim9-L, forward
TCTGGGTGAGGAAGGGAGCC	Trim9-L, reverse
ATGTTCACGAGATACCGGTGTC	Trim9-S, forward
TCTGTAACTGTGGTACCGGGGA	Trim9-S, reverse
ACCTGCTGCCACTCATCACA	TRIM9-L, forward
GGTCCTTTGCCCTCTGGTCAC	TRIM9-L, reverse
CAAATGGGTGGTGGGGTGCT	TRIM9-S, forward
ACGGAGGCAGTCTAAGTGGGT	TRIM9-S, reverse
TGCTCAGCCAGGTCTCTCAGA	Tsc1, forward
CTCATTGACCTCCCCGAGCAC	Tsc1, reverse
GGGCCCCTTTCACCTCCAAC	Tsc2, forward
GCACCTTCCAGTCGCTCTCC	Tsc2, reverse
CATGCTGGGTGTGCGGGAC	TSC1, forward
TGTGCAATGCCGGCTGAGA	TSC1, reverse
TCTGTCTGCTGTGCGTCCG	TSC2, forward
TCGCAGAGCTCCTTGACGT	TSC2, reverse
ACCCAGGAGAAGATGAAGTTGAAGG	Nudt21, forward
CCACCAGTTCCCAATGCAGTCA	Nudt21, reverse
CGAGAGCTGTGTCTGATGCCA	CPSF6, forward
ACTTTGCAACGATCATCAGCAGA	CPSF6, reverse
ACCCCATGTGTTACTGCTGCA	NUDT21, forward
ACTCCATCCTGACGACCCAG	NUDT21, reverse
AGAACCCACTGCTTACTGGCT	APA reporter assay, test PAS specific, forward
CGTGCCTTCCTTGACCCTGG	APA reporter assay, bGH PAS specific, forward
CACTCTTTCCCTACACGACGCTC	APA reporter assay, universal (anchored), reverse
CACTCTTTCCCTACACGACGCTCTTTTTTTTTTTTTTTTTTTTTTTTTVN	RT primer for PAS reporter assay (R1-T25-VN)
TGTGGGCAGAGCAAAAGACATC	BMPR1B, both proximal and distal isoforms, forward
TGTCTTTGCCCAGGTCGCTC	BMPR1B, both proximal and distal isoforms, reverse
TTGGTGTGTAGTCAAGTATAGCAAGT	BMPR1B, distal isoform, forward
TGCCGTTCCACCCACAAACA	BMPR1B, distal isoform, reverse
GGTTTTTGTATGCTGGGTTTGCCT	MOB4, both proximal and distal isoforms, forward
CCATGAGTGCCACACTGGTGA	MOB4, both proximal and distal isoforms, reverse
TGTCTCACAATGGATTTCTGTTGCT	MOB4, distal isoform, forward
AGTCCCCGTTAACACTAAGCCA	MOB4, distal isoform, reverse
GCCTTCTCCACACCTCCCTGA	BRD4-L, forward
AGGGTTGGGAAATGGCTGGAG	BRD4-L, reverse
GGCAGAGAACGTTCAGGGCTT	BRD4-S, forward
CACAGGAGGCTGCCAACAAGA	BRD4-S, reverse

## Sheet: TableS4B_Cloning_Oligos
Table S4B. List of oligos
Oligo Sequence (5' to 3')	Description
/5Phos/CTAGCGGTGATTATGGGAGTGCTATTTACTAGTAATAGCACTCCCATAATCACCTTTTTG	CPSF6 shRNA, sense oligo
/5Phos/AATTCAAAAAGGTGATTATGGGAGTGCTATTACTAGTAAATAGCACTCCCATAATCACCG	CPSF6 shRNA, antisense oligo
/5Phos/ctagaACATGTAAAAATAATGTACTAGAACACTTTCAATAAAGGCAAATGTTTTTATTTGTACACTCTCGGGTGATTATTTACCCc	L3-WT PAS, sense oligo
/5Phos/tcgagGGGTAAATAATCACCCGAGAGTGTACAAATAAAAACATTTGCCTTTATTGAAAGTGTTCTAGTACATTATTTTTACATGTt	L3-WT PAS, antisense oligo
/5Phos/ctagaACATGGGAAAATAATGGGCTAGAACACTTTCAATAAAGGCAAATGTTTTTATTTGTACACTCTCGGGTGATTATTTACCCc	L3-MU PAS, sense oligo
/5Phos/tcgagGGGTAAATAATCACCCGAGAGTGTACAAATAAAAACATTTGCCTTTATTGAAAGTGTTCTAGCCCATTATTTTCCCATGTt	L3-MU PAS, antisense oligo
/5Phos/ctagaATTGTATTGTATTTGTTACAGATTGTATATGGCTTTGTTTTAACATTCCCCTAAATAAAATGGCTTCATTCTCCCCTTGGc	BMPR1B distal WT PAS, sense oligo
/5Phos/tcgagCCAAGGGGAGAATGAAGCCATTTTATTTAGGGGAATGTTAAAACAAAGCCATATACAATCTGTAACAAATACAATACAATt	BMPR1B distal WT PAS, antisense oligo
/5Phos/ctagaATTGGGTTGGGTTTGTTACAGATTGTATATGGCTTTGTTTTAACATTCCCCTAAATAAAATGGCTTCATTCTCCCCTTGGc	BMPR1B distal MU PAS, sense oligo
/5Phos/tcgagCCAAGGGGAGAATGAAGCCATTTTATTTAGGGGAATGTTAAAACAAAGCCATATACAATCTGTAACAAACCCAACCCAATt	BMPR1B distal MU PAS, antisense oligo
/5Phos/ctagaTACTCATTTCACCTTCCCTGTACTGTATGTTTGGAATTGATCATAAAACATCTCCAAAAGAAAATAATCAGTTTGTAGTCc	MOB4 distal WT PAS, sense oligo
/5Phos/tcgagGACTACAAACTGATTATTTTCTTTTGGAGATGTTTTATGATCAATTCCAAACATACAGTACAGGGAAGGTGAAATGAGTAt	MOB4 distal WT PAS, antisense oligo
/5Phos/ctagaTACTCATTTCACCTTCCCTGGGCTGGGTGTTTGGAATTGATCATAAAACATCTCCAAAAGAAAATAATCAGTTTGTAGTCc	MOB4 distal MU PAS, sense oligo
/5Phos/tcgagGACTACAAACTGATTATTTTCTTTTGGAGATGTTTTATGATCAATTCCAAACACCCAGCCCAGGGAAGGTGAAATGAGTAt	MOB4 distal MU PAS, antisense oligo
/5Phos/ctagaTGTGTGTGTTTGTTCTTTTTATTGAATCTATTTAAGTAAAAAAAAAATTGGTTCTTTATTAATTTCTGTTGTCTTTTTTTc	JUNB WT PAS, sense oligo
/5Phos/tcgagAAAAAAAGACAACAGAAATTAATAAAGAACCAATTTTTTTTTTACTTAAATAGATTCAATAAAAAGAACAAACACACACAt	JUNB WT PAS, antisense oligo
/5Phos/ctagaTGTGTGTGTTTGTACTGTATATTGAATCTATTTAAGTAAAAAAAAAATTGGTTCTTTATTAATTTCTGTTGTCTTTTTTTc	JUNB 2xTGTA PAS, sense oligo
/5Phos/tcgagAAAAAAAGACAACAGAAATTAATAAAGAACCAATTTTTTTTTTACTTAAATAGATTCAATATACAGTACAAACACACACAt	JUNB 2xTGTA PAS, antisense oligo
/5Phos/ctagaTGTGTGTGTTTGTACTTTTTATTGAATCTATTTAAGTAAAAAAAAAATTGGTTCTTTATTAATTTCTGTTGTCTTTTTTTc	JUNB 1xTGTA PAS, sense oligo
/5Phos/tcgagAAAAAAAGACAACAGAAATTAATAAAGAACCAATTTTTTTTTTACTTAAATAGATTCAATAAAAAGTACAAACACACACAt	JUNB 1xTGTA PAS, antisense oligo
/5Phos/ctagaTGTGTGTGTTTGGGCTGGGTATTGAATCTATTTAAGTAAAAAAAAAATTGGTTCTTTATTAATTTCTGTTGTCTTTTTTTc	JUNB 2xTGGG PAS, sense oligo
/5Phos/tcgagAAAAAAAGACAACAGAAATTAATAAAGAACCAATTTTTTTTTTACTTAAATAGATTCAATACCCAGCCCAAACACACACAt	JUNB 2xTGGG PAS, antisense oligo
ATACCGTCTAGAACGGAACAAGTTCTCTTCCAACA	TRIM9S PAS cloning, forward
ATACCGTCTAGAACTGAATGTATTAGAATGAGGGAGAAACA	TRIM9S PAS cloning, reverse
tgggGAAATTAATTTCCTCCATGAATTTTATATATTG	TRIM9S TGTA mutagensis, #1#2, forward
gcccaGTTTCTTTGTTGGAAGAGAAC	TRIM9S TGTA mutagensis, #1#2, reverse
aaggtatgggTCTGAATACAAAGAAAAGCC	TRIM9S TGTA mutagensis, #3#4, forward
atatttgcccaCAATATATAAAATTCATGGAGGAAATTAATTTC	TRIM9S TGTA mutagensis, #3#4, reverse
ATACCGCTCGAGAGAGTAAGAGGTGTGTACAAGCCC	BRD4L PAS cloning, forward
ATACCGCTCGAGAGCAGCCATCACAGGAGAGT	BRD4L PAS cloning, reverse
tgggTGCACGGATCGCTTGGCC	BRD4L TGTA mutagensis, #1#2, forward
gcccaGTGGGGGCTTGTACACACC	BRD4L TGTA mutagensis, #1#2, reverse
CTGAGACTTGggTTAAACACTTTAGACATTTG	BRD4L TGTA mutagensis, #3, forward
ATTCACTGACATAATTATTGG	BRD4L TGTA mutagensis, #3, reverse
TAGACATTTGggGAAGGGAATTCGTAG	BRD4L TGTA mutagensis, #4, forward
AAGTGTTTAATACAAGTCTCAG	BRD4L TGTA mutagensis, #4, reverse
/5Phos/ctagaATTGGGTTGTATTTGTTACAGATTGTATATGGCTTTGTTTTAACATTCCCCTAAATAAAATGGCTTCATTCTCCCCTTGGc	BMPR1B distal MU1 PAS, sense oligo
/5Phos/tcgagCCAAGGGGAGAATGAAGCCATTTTATTTAGGGGAATGTTAAAACAAAGCCATATACAATCTGTAACAAATACAACCCAATt	BMPR1B distal MU1 PAS, antisense oligo
/5Phos/ctagaATTGTATTGGGTTTGTTACAGATTGTATATGGCTTTGTTTTAACATTCCCCTAAATAAAATGGCTTCATTCTCCCCTTGGc	BMPR1B distal MU2 PAS, sense oligo
/5Phos/tcgagCCAAGGGGAGAATGAAGCCATTTTATTTAGGGGAATGTTAAAACAAAGCCATATACAATCTGTAACAAACCCAATACAATt	BMPR1B distal MU2 PAS, antisense oligo
/5Phos/ctagaTACTCATTTCACCTTCCCTGGGCTGTATGTTTGGAATTGATCATAAAACATCTCCAAAAGAAAATAATCAGTTTGTAGTCc	MOB4 distal MU1 PAS, sense oligo
/5Phos/tcgagGACTACAAACTGATTATTTTCTTTTGGAGATGTTTTATGATCAATTCCAAACATACAGCCCAGGGAAGGTGAAATGAGTAt	MOB4 distal MU1 PAS, antisense oligo
/5Phos/ctagaTACTCATTTCACCTTCCCTGTACTGGGTGTTTGGAATTGATCATAAAACATCTCCAAAAGAAAATAATCAGTTTGTAGTCc	MOB4 distal MU2 PAS, sense oligo
/5Phos/tcgagGACTACAAACTGATTATTTTCTTTTGGAGATGTTTTATGATCAATTCCAAACACCCAGTACAGGGAAGGTGAAATGAGTAt	MOB4 distal MU2 PAS, antisense oligo
ACAAAGAAACtgggCTGTAGAAATTAATTTC	TRIM9S TGTA mutagensis, #1, forward
TGGAAGAGAACTTGTTCC	TRIM9S TGTA mutagensis, #1, reverse
GAAACTGTACtgggGAAATTAATTTCCTC	TRIM9S TGTA mutagensis, #2, forward
TTTGTTGGAAGAGAACTTG	TRIM9S TGTA mutagensis, #2, reverse
