# Supplementary material for: A twin UGUA motif directs the balance between gene isoforms through CFIm and the mTORC1 signaling pathway
Source: eLife. 2023 Sep 4;12:e85036. doi: 10.7554/eLife.85036 (PMC10476966; doi:10.7554/eLife.85036)
Supplement: Supplementary file 5. [file elife-85036-supp5.xlsx]

## Sheet: TableS5_siRNAs
Table S5. List of siRNAs
GeneName	siRNA_ID	Series	Designation	Figure
Silencer™ Select Negative Control No. 1 siRNA	N/A	Silencer Select	siCtrl	Multiple
Tsc1	s82322, s82323	Silencer Select	siTsc1	2F, S2B
Tsc2	s75510, s75511	Silencer Select	siTsc2	2F, S2B
TSC1	s502594, s526834	Silencer Select	siTSC1	7D, S7B
TSC2	s533032, s533034	Silencer Select	siTSC2	2G, S2C
Trim9 (Trim9-L specific)	J-058811-09	ON-TARGETplus	siTrim9-L	S2A
Trim9 (Target both Trim9-L and Trim9-S)	s96960	Silencer Select	siTrim9-L/S	S2A
Nudt21	s86409, s86410	Silencer Select	siNudt21	3C, 3D
CPSF6	s21773, s223186	Silencer Select	siCPSF6	3E, 3F
NUDT21	s21771, s21772	Silencer Select	siNUDT21	3E, 3F
CPSF6	J-012334-09/10/11/12	ON-TARGETplus	siCPSF6	6D, S6C
