# Supplementary material for: A twin UGUA motif directs the balance between gene isoforms through CFIm and the mTORC1 signaling pathway
Source: eLife. 2023 Sep 4;12:e85036. doi: 10.7554/eLife.85036 (PMC10476966; doi:10.7554/eLife.85036)
Supplement: Supplementary file 6. [file elife-85036-supp6.xlsx]

## Sheet: TableS6_Plasmids
Table S6. List of Plasmids
Designation	Source or reference	Identifiers
pEMS1985	Addgene	#49116
pAAV-CaMKII-GFP	Addgene	#64545
EZ-Tet-pLKO-Puro	Addgene	#85966
pUCmini-iCAP-PHP.eB	Addgene	#103005
pAAV-Camk2a-iCre	This paper
EZ-Tet-shCPSF6-Puro	This paper
GFP APA reporter	This paper
L3-WT PAS reporter	This paper
L3-MU PAS reporter	This paper
TRIM9S-WT PAS reporter	This paper
TRIM9S-MU12 PAS reporter	This paper
TRIM9S-MU34 PAS reporter	This paper
TRIM9S-MU1 PAS reporter	This paper
TRIM9S-MU2 PAS reporter	This paper
BMPR1B-distal-WT PAS reporter	This paper
BMPR1B-distal-MU PAS reporter	This paper
BMPR1B-distal-MU1 PAS reporter	This paper
BMPR1B-distal-MU2 PAS reporter	This paper
MOB4-distal-WT PAS reporter	This paper
MOB4-distal-MU PAS reporter	This paper
MOB4-distal-MU1 PAS reporter	This paper
MOB4-distal-MU2 PAS reporter	This paper
BRD4L-WT PAS reporter	This paper
BRD4L-MU12 PAS reporter	This paper
BRD4L-MU34 PAS reporter	This paper
JUNB-WT PAS reporter	This paper
JUNB-2xTGTA PAS reporter	This paper
JUNB-1xTGTA PAS reporter	This paper
JUNB-2xTGGG PAS reporter	This paper
