# Supplementary figures and images for: A twin UGUA motif directs the balance between gene isoforms through CFIm and the mTORC1 signaling pathway
Source: eLife journal article supplement (doi:10.7554/elife.85036), 2023-08-17

Fig. 1D-source data

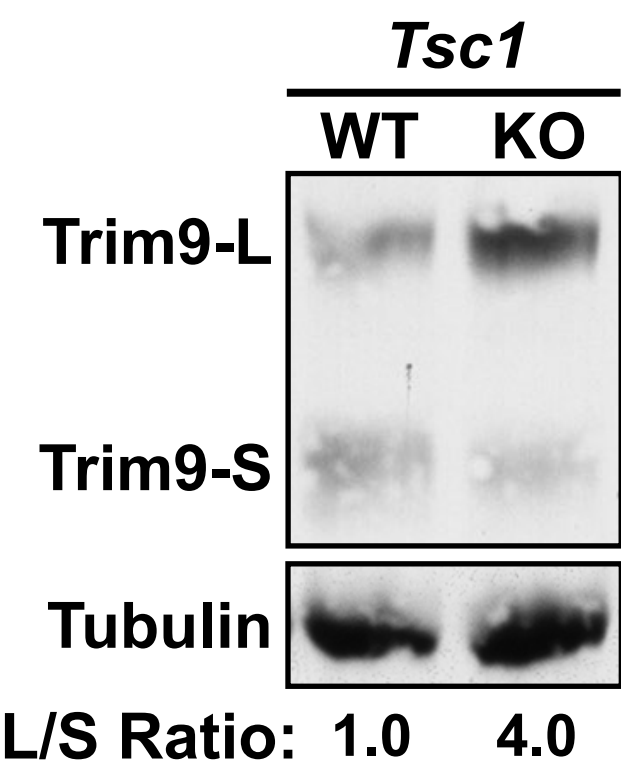

Figure panel

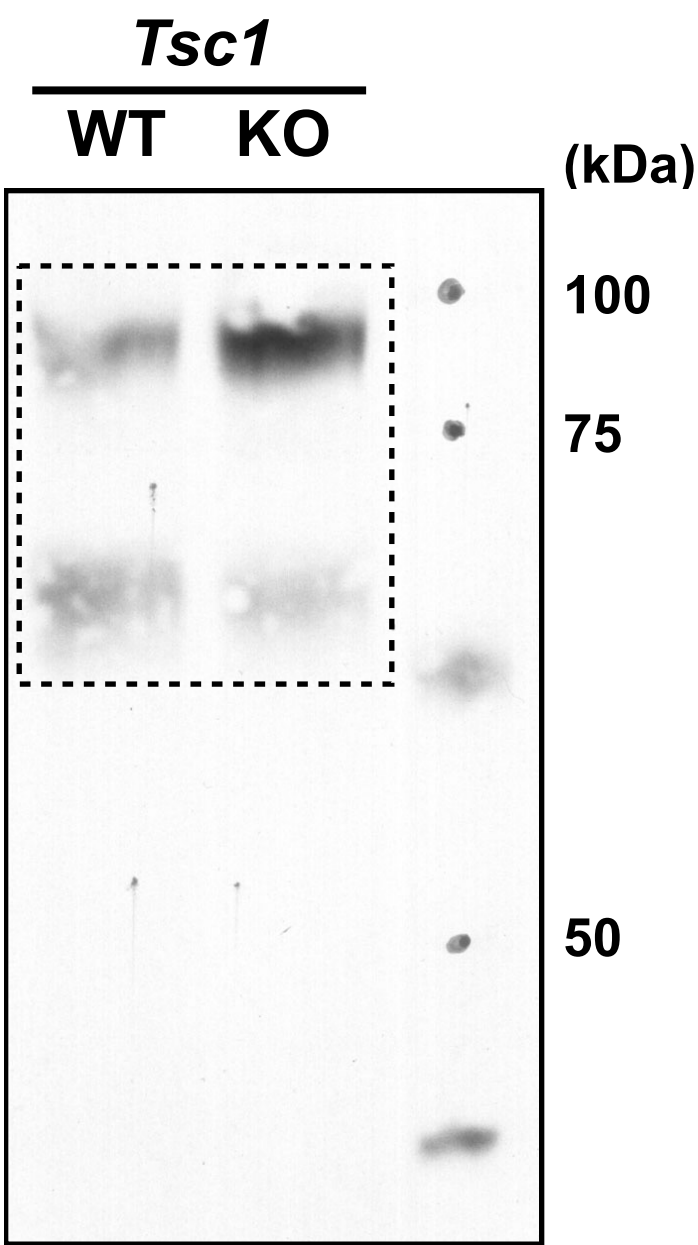

WB: Trim9

Source data 2

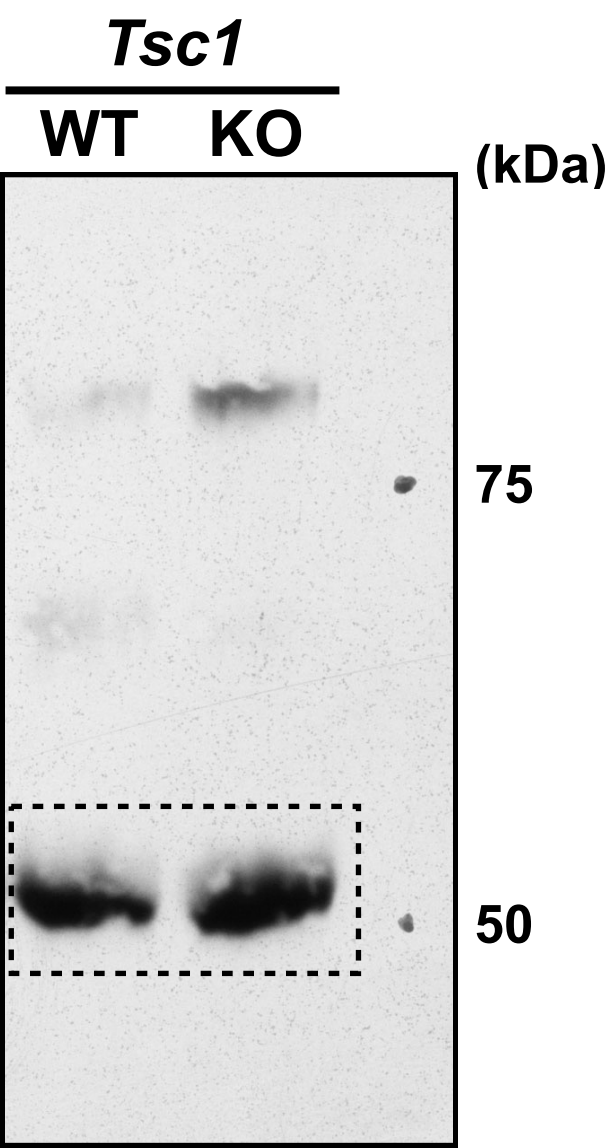

WB: Tubulin (re-blot)

Source data 3

Supplement: fig1-data1 [file elife-85036-fig1-data1-v1.zip]

Fig. S1B-source data

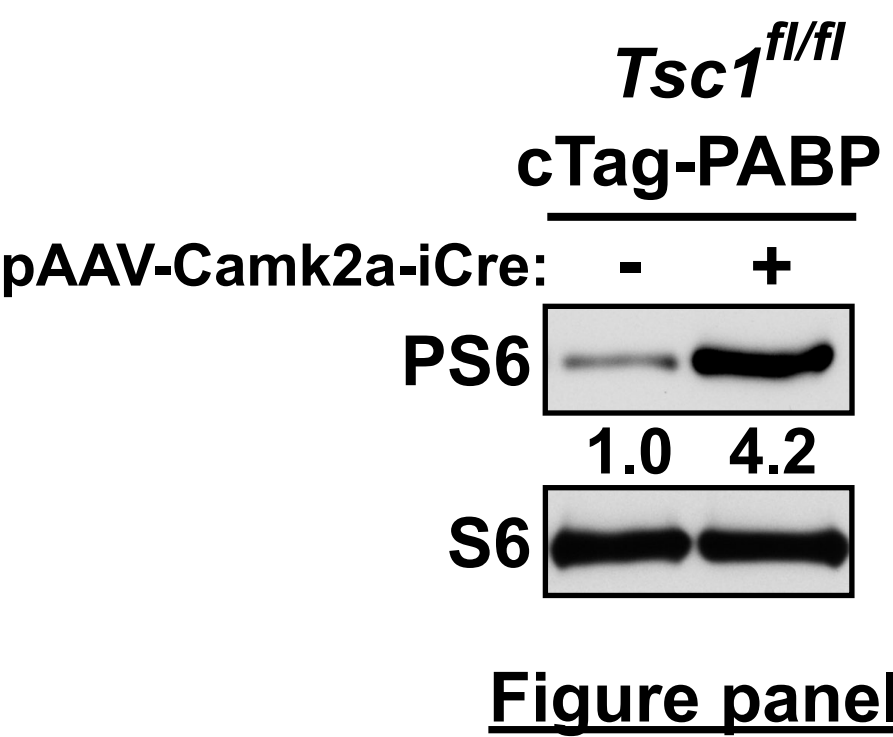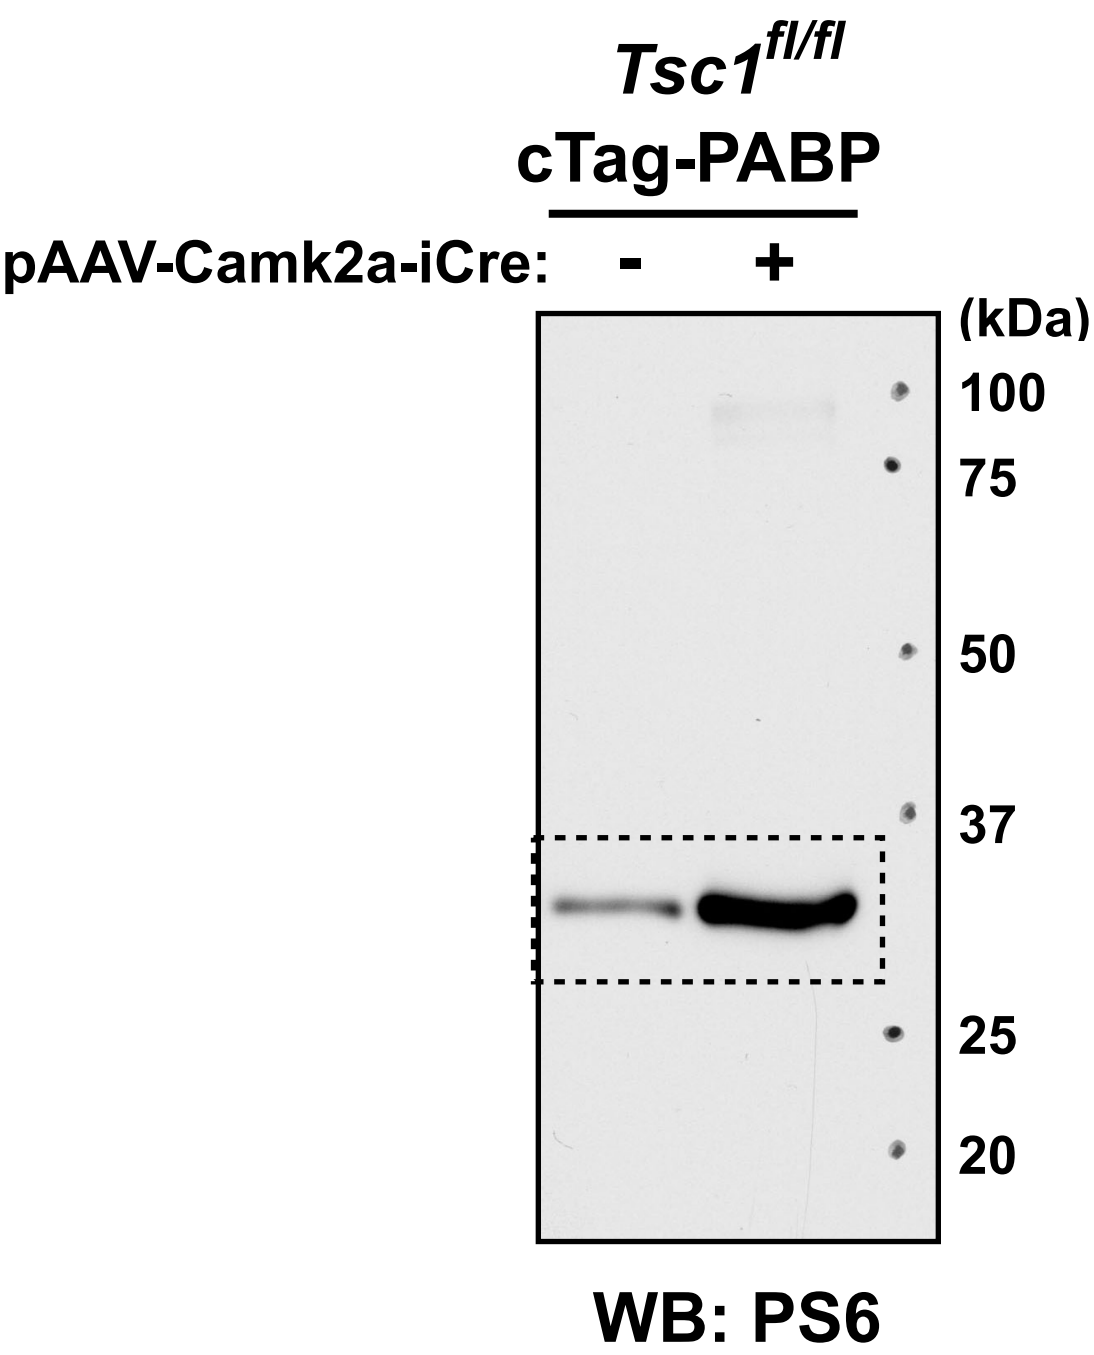

Source data 2

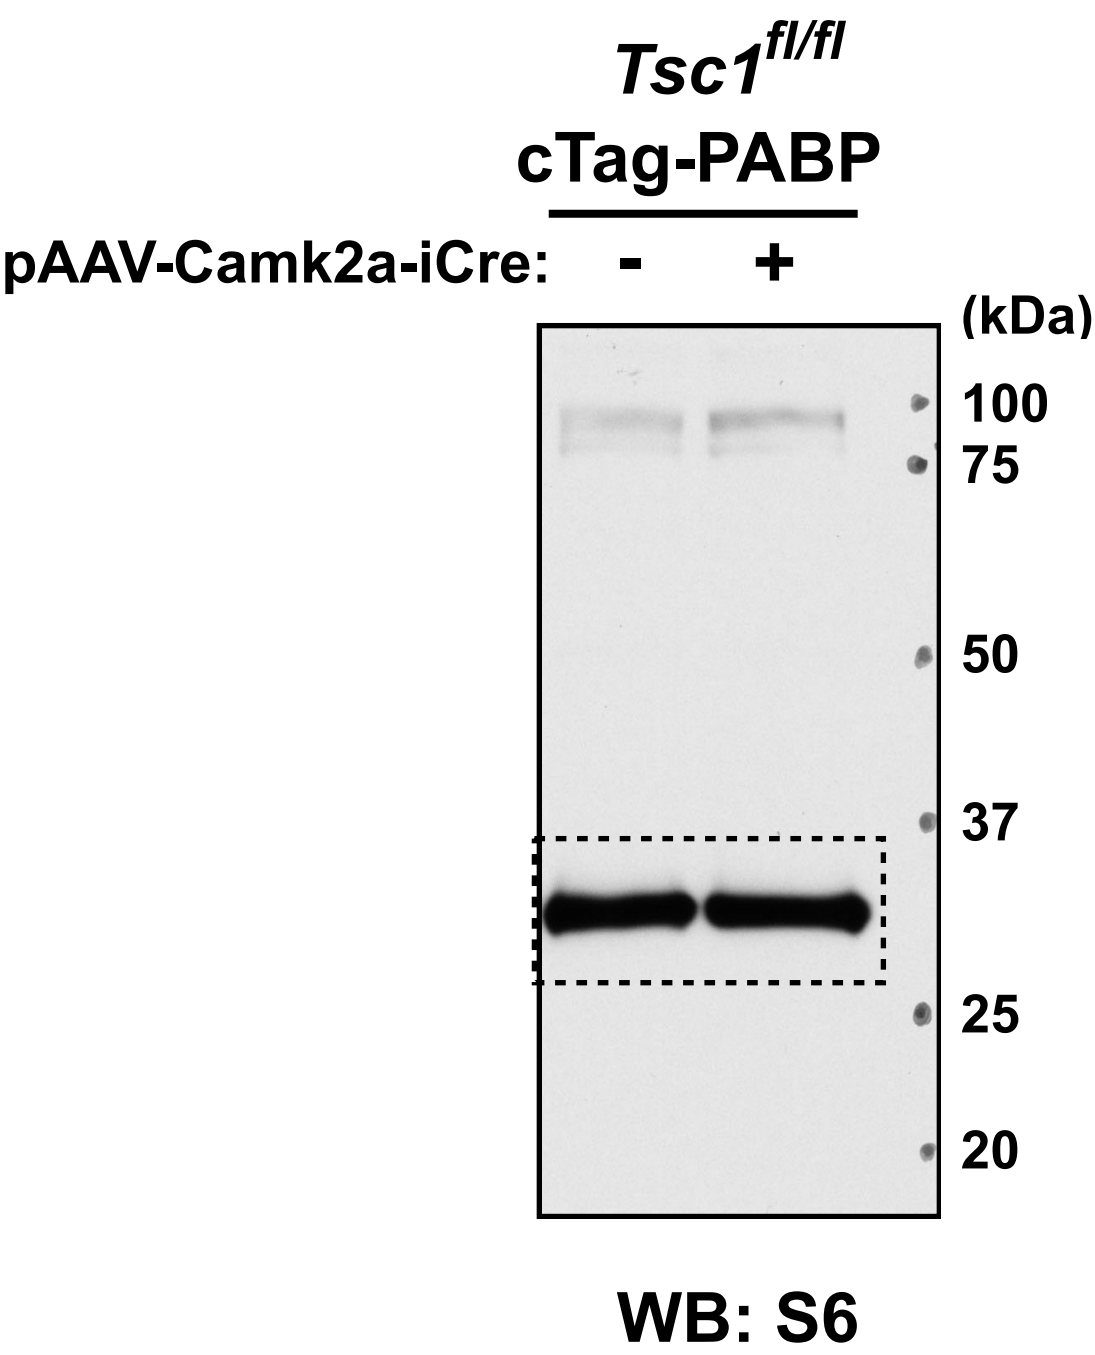

Source data 3

Supplement: fig1-figsupp1-data1 [file elife-85036-fig1-figsupp1-data1-v1.zip]

Fig. S1C-source data

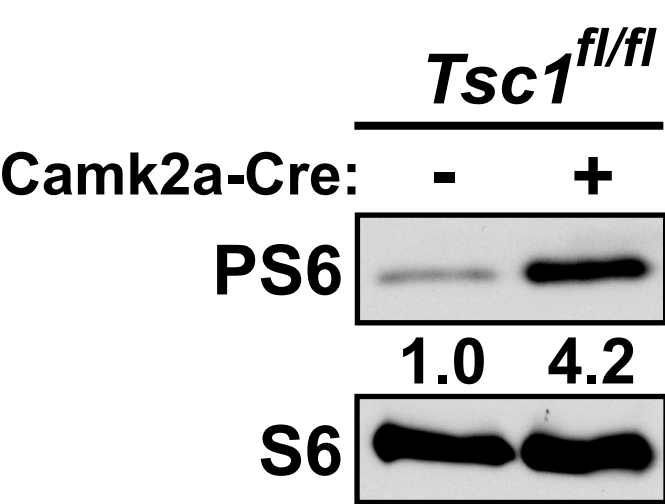

Figure panel

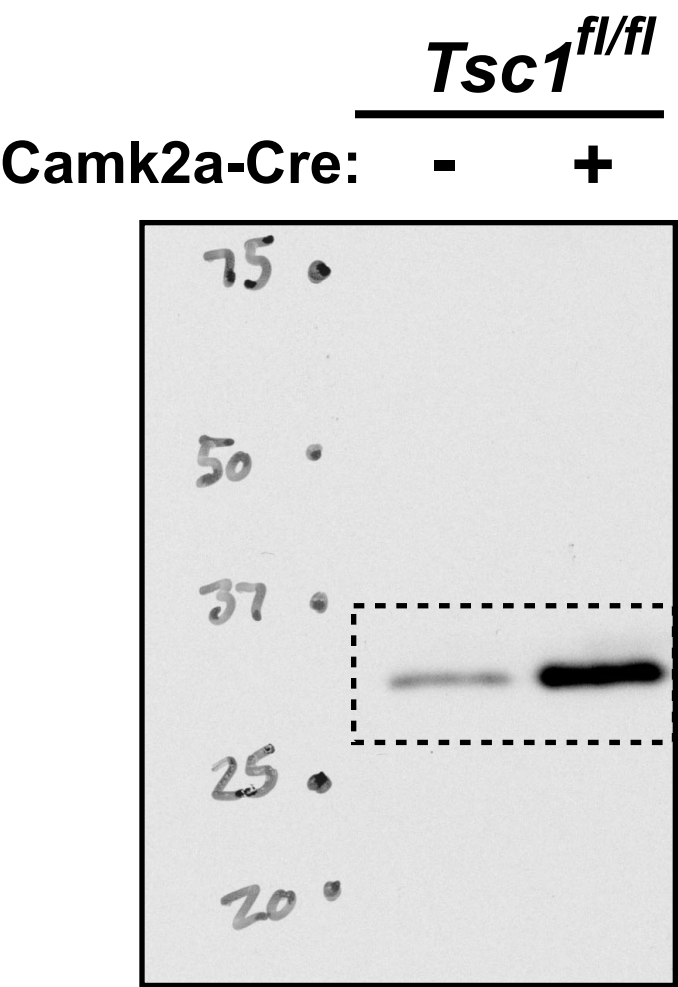

WB: PS6

Source data 2

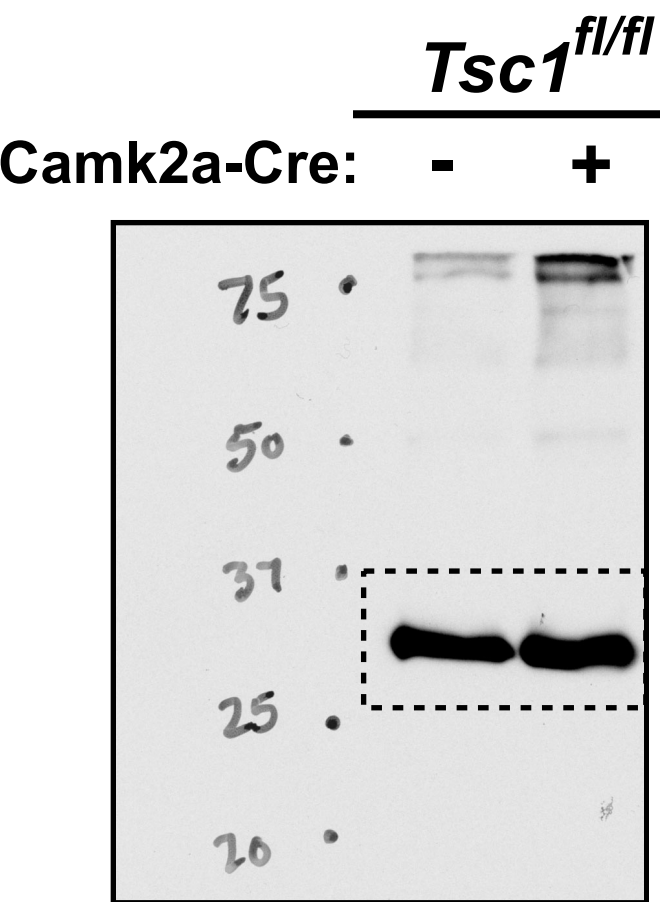

WB: S6

Source data 3

Supplement: fig1-figsupp1-data2 [file elife-85036-fig1-figsupp1-data2-v1.zip]

Fig. 2C-source data

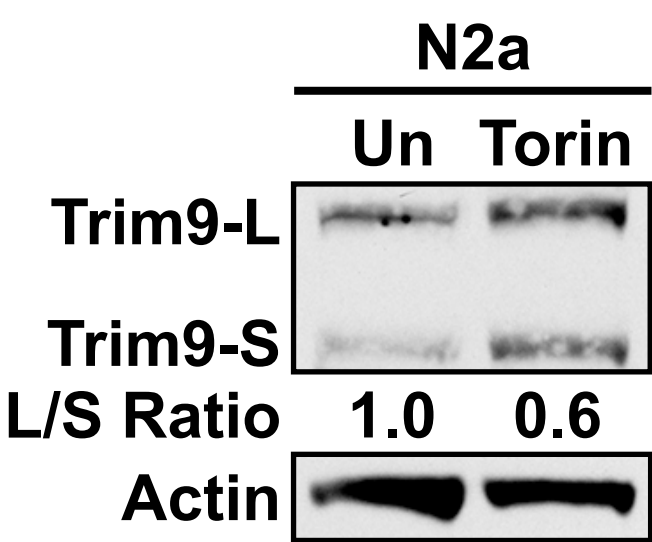

Figure panel

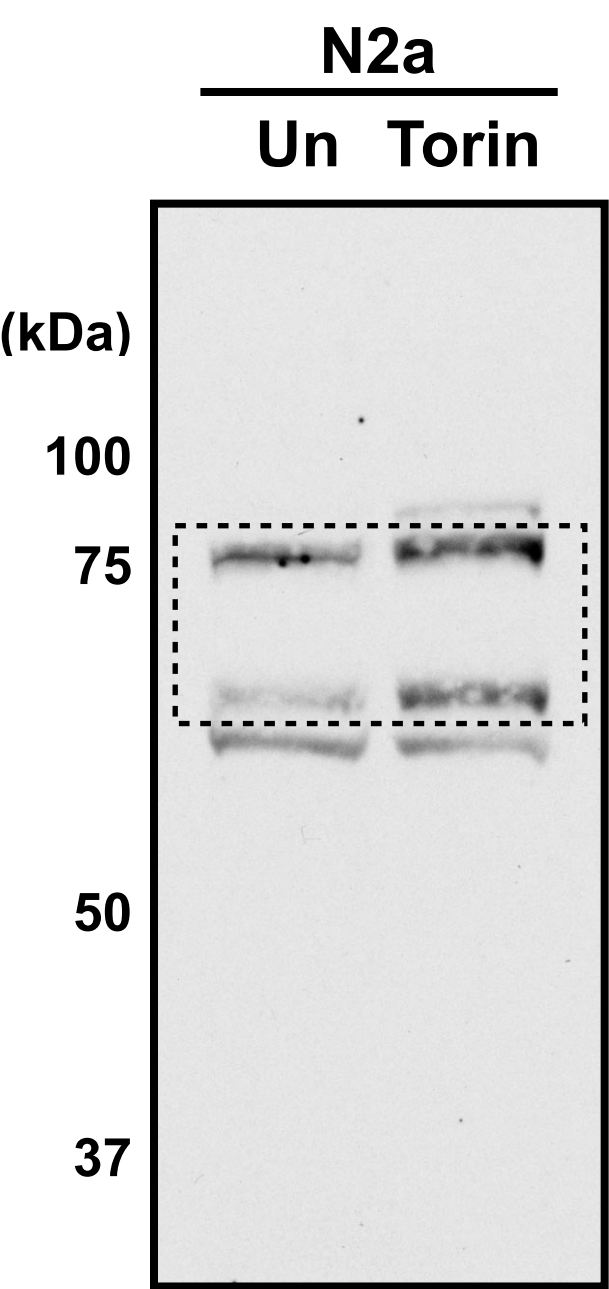

WB: Trim9

Source data 2

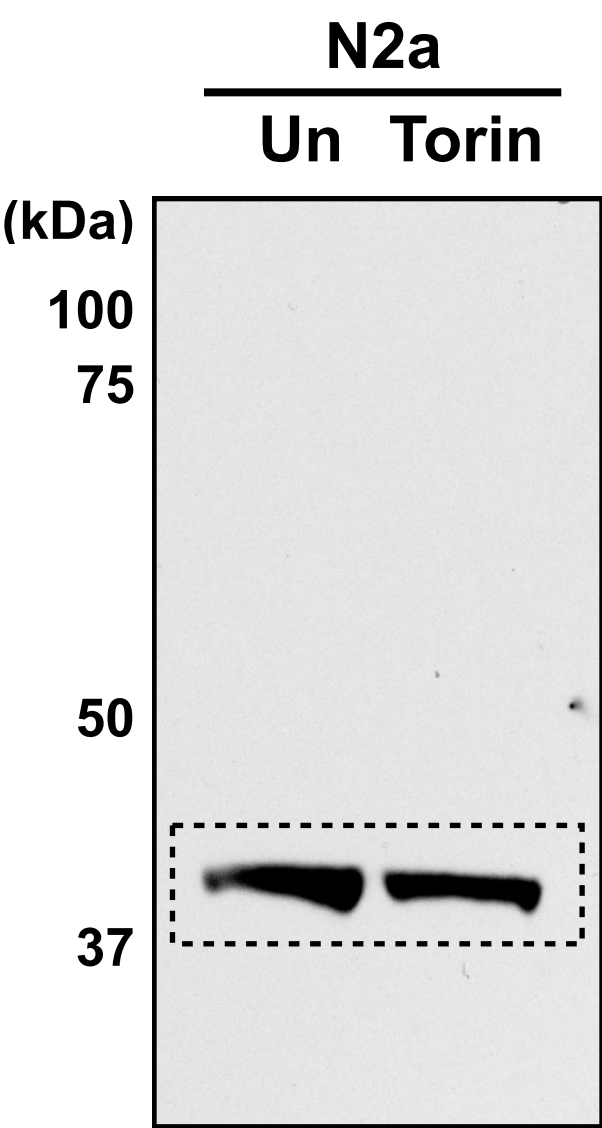

WB: Actin

Source data 3

Supplement: fig2-data2 [file elife-85036-fig2-data2-v1.zip]

Fig. 2E-source data

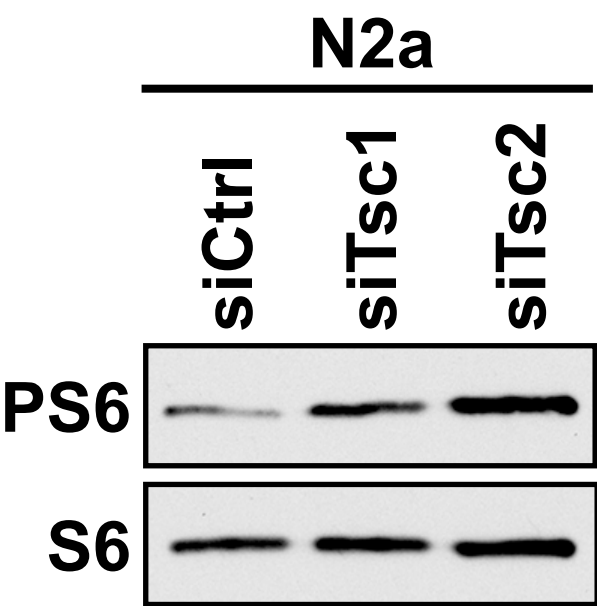

Figure panel

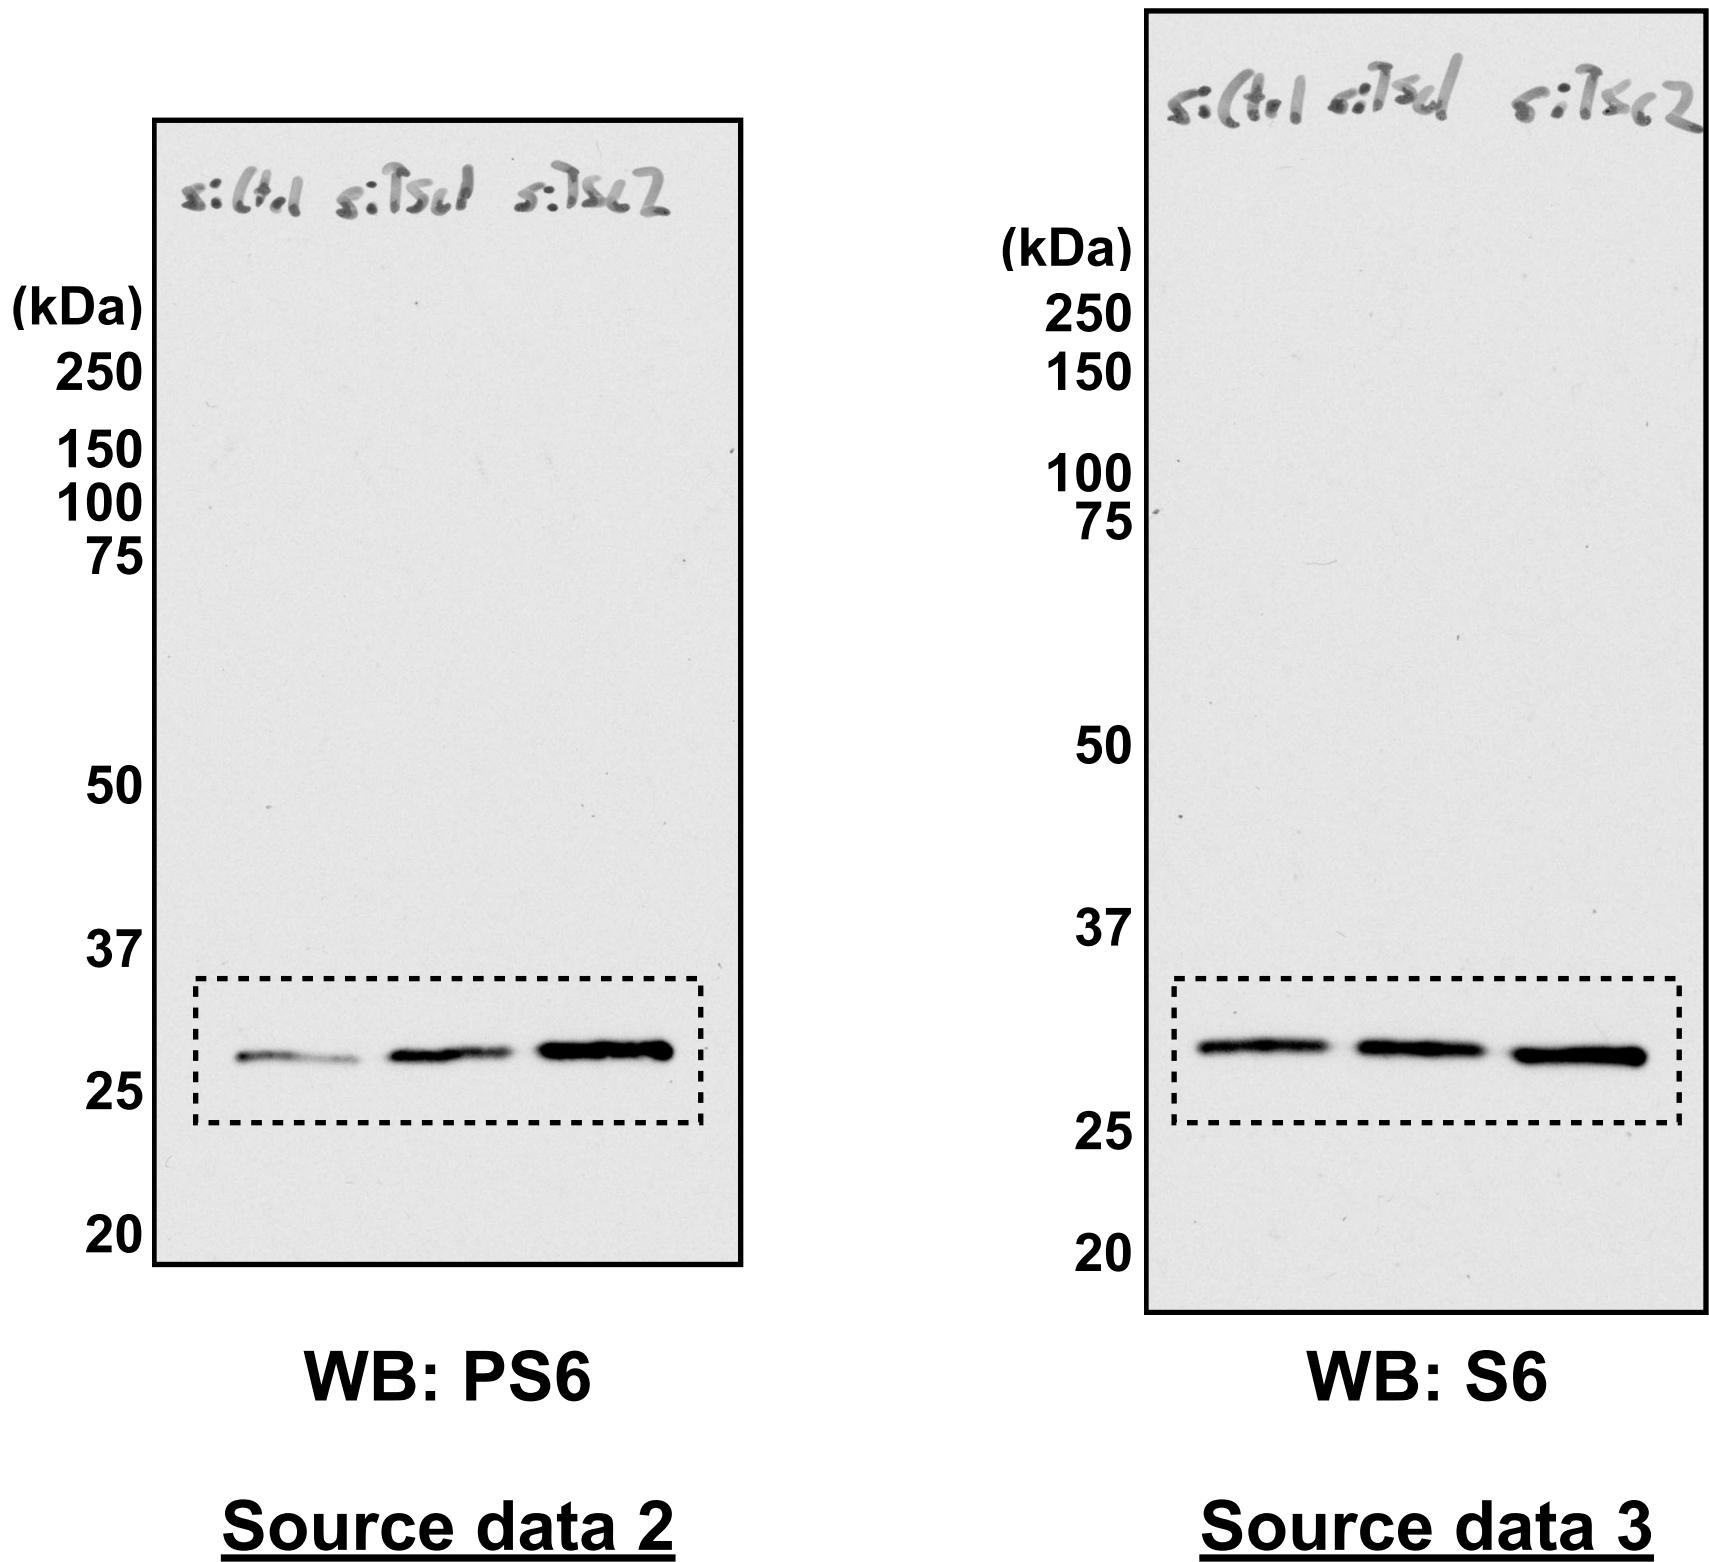

Supplement: fig2-data3 [file elife-85036-fig2-data3-v1.zip]

Fig. S2A-source data

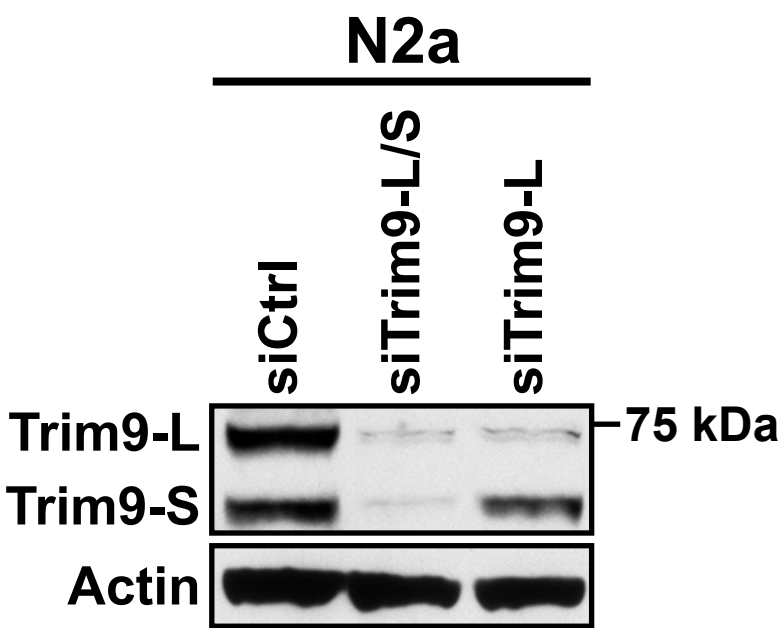

Figure panel

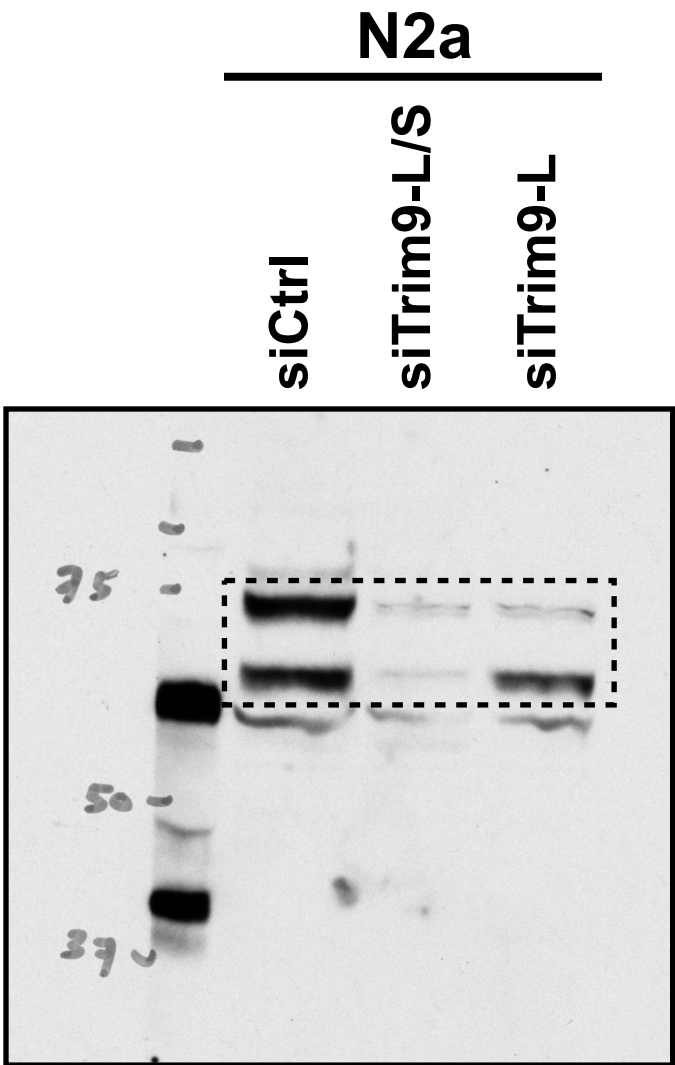

WB: Trim9

Source data 2

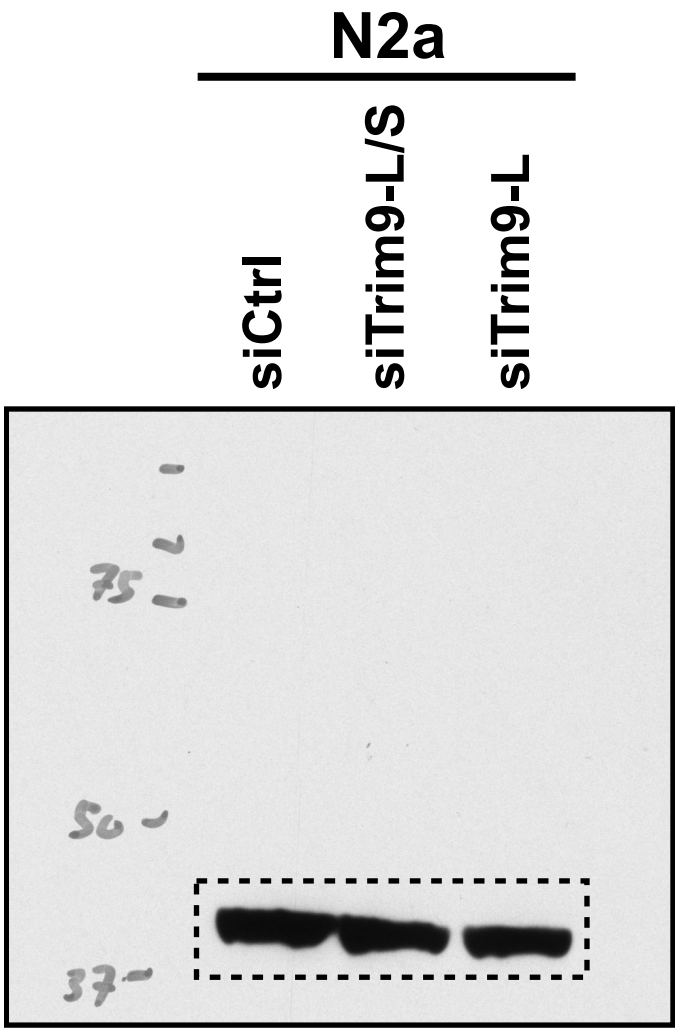

WB: Actin

Source data 3

Supplement: fig2-figsupp1-data1 [file elife-85036-fig2-figsupp1-data1-v1.zip]

Fig. 3A-source data

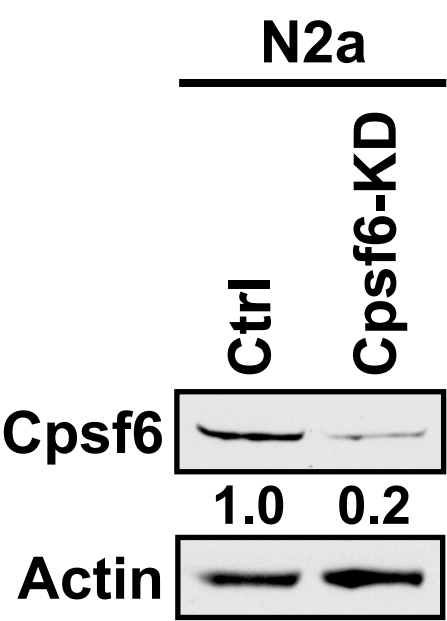

Figure panel

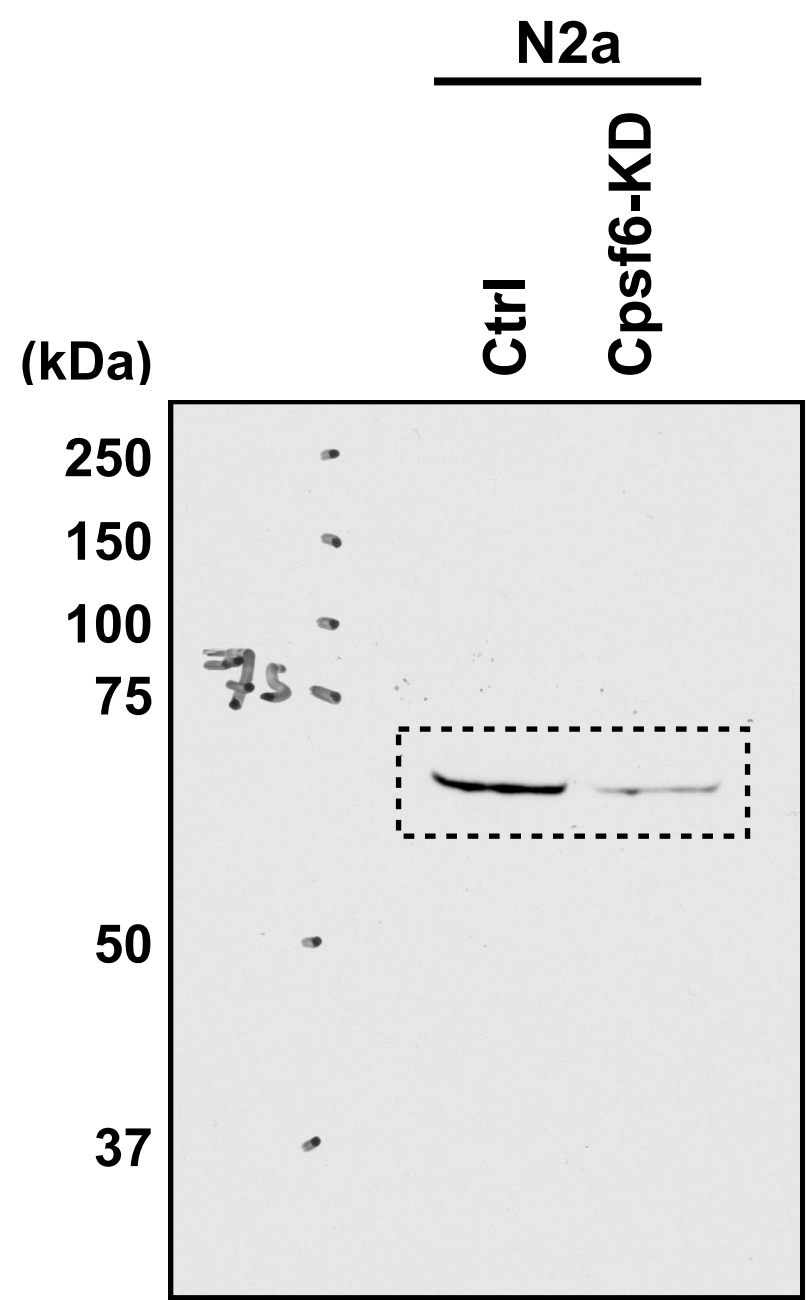

WB: CPSF6

Source data 2

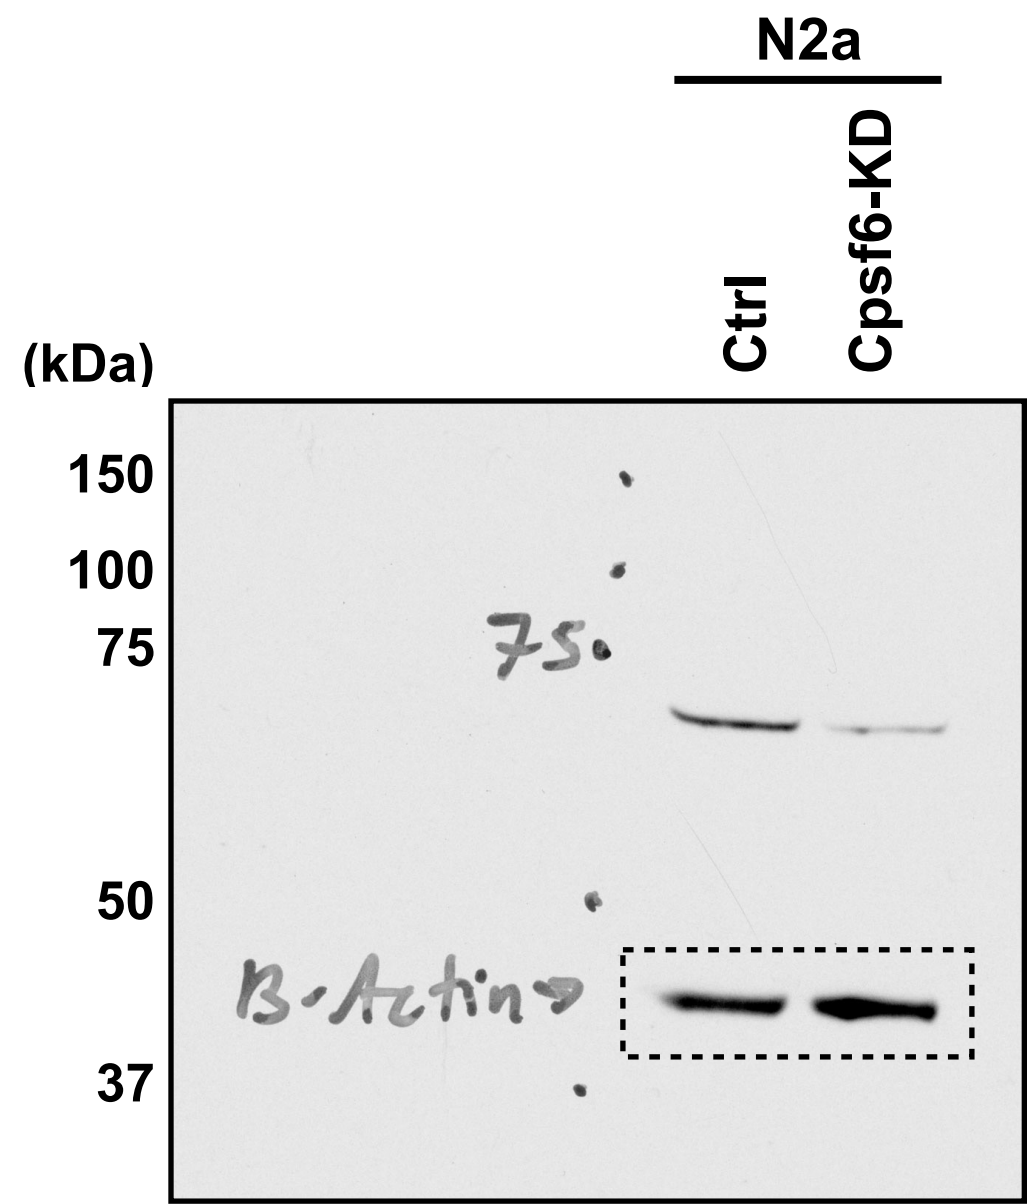

WB: Tubulin (re-blot)

Source data 3

Supplement: fig3-data1 [file elife-85036-fig3-data1-v1.zip]

Fig. S4C-source data

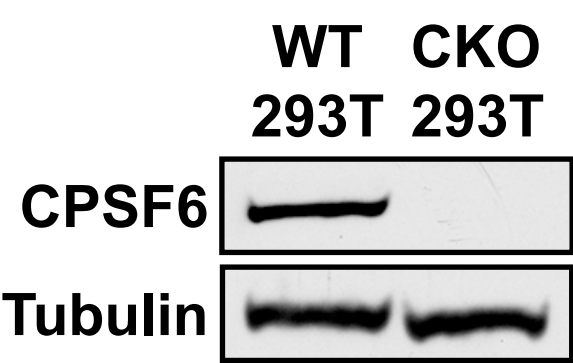

Figure panel

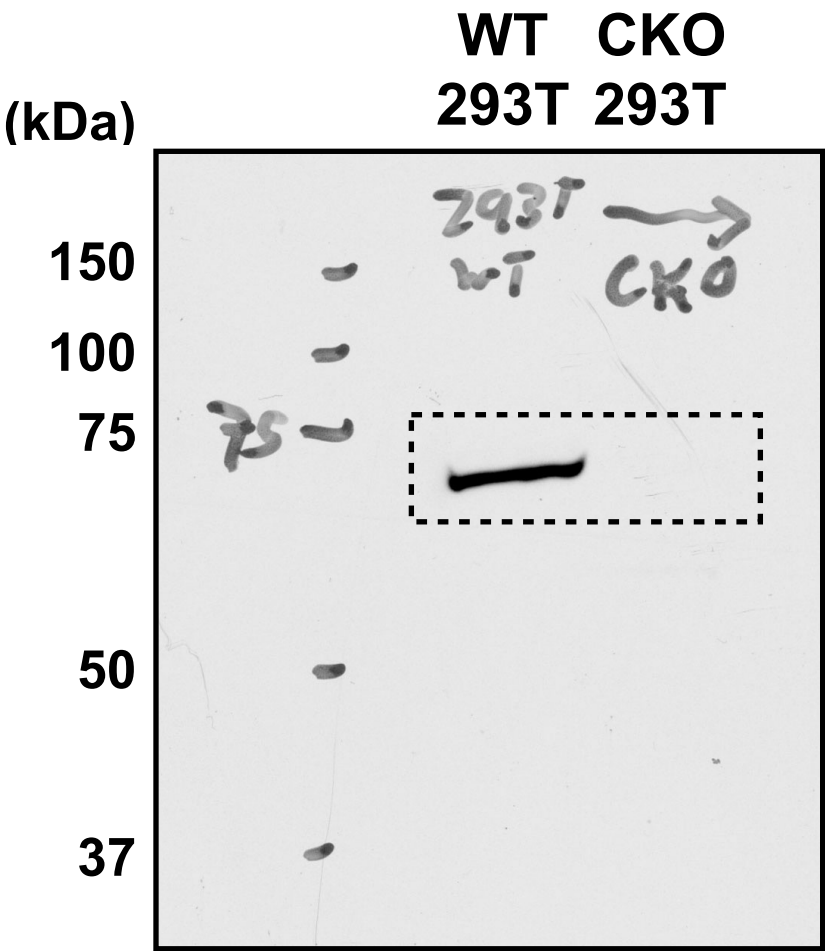

WB: CPSF6

Source data 2

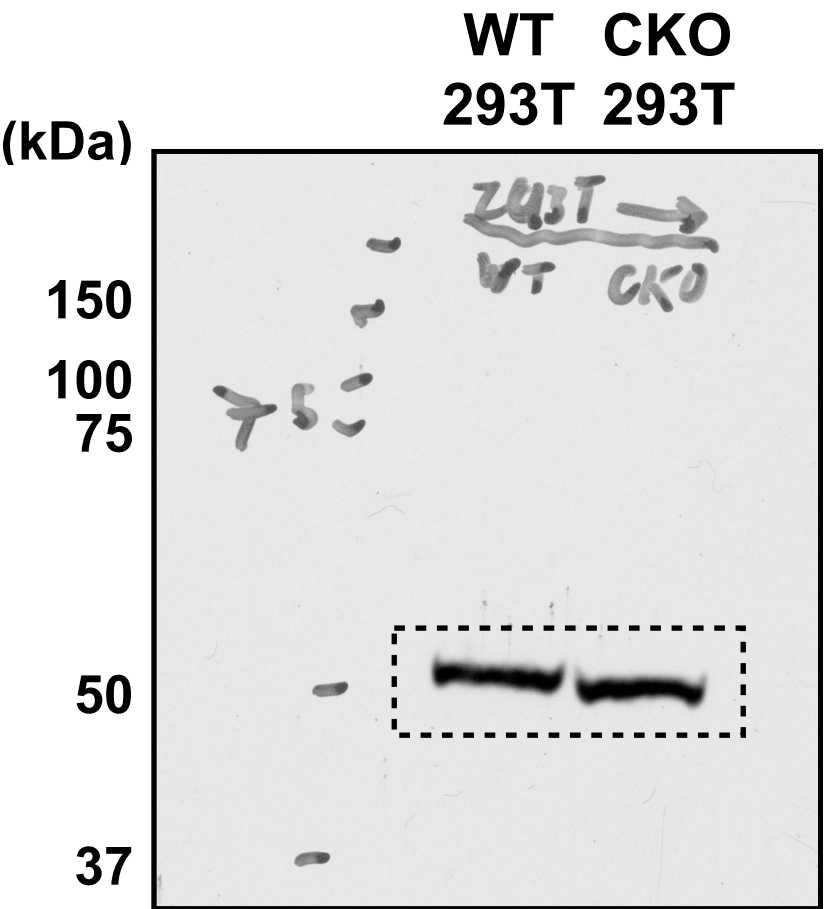

WB: Tubulin

Source data 3

Supplement: fig4-figsupp1-data1 [file elife-85036-fig4-figsupp1-data1-v1.zip]

Fig. 5A-source data

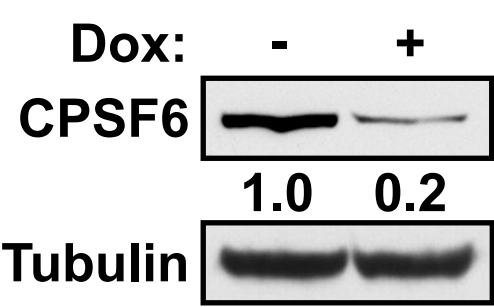

Figure panel

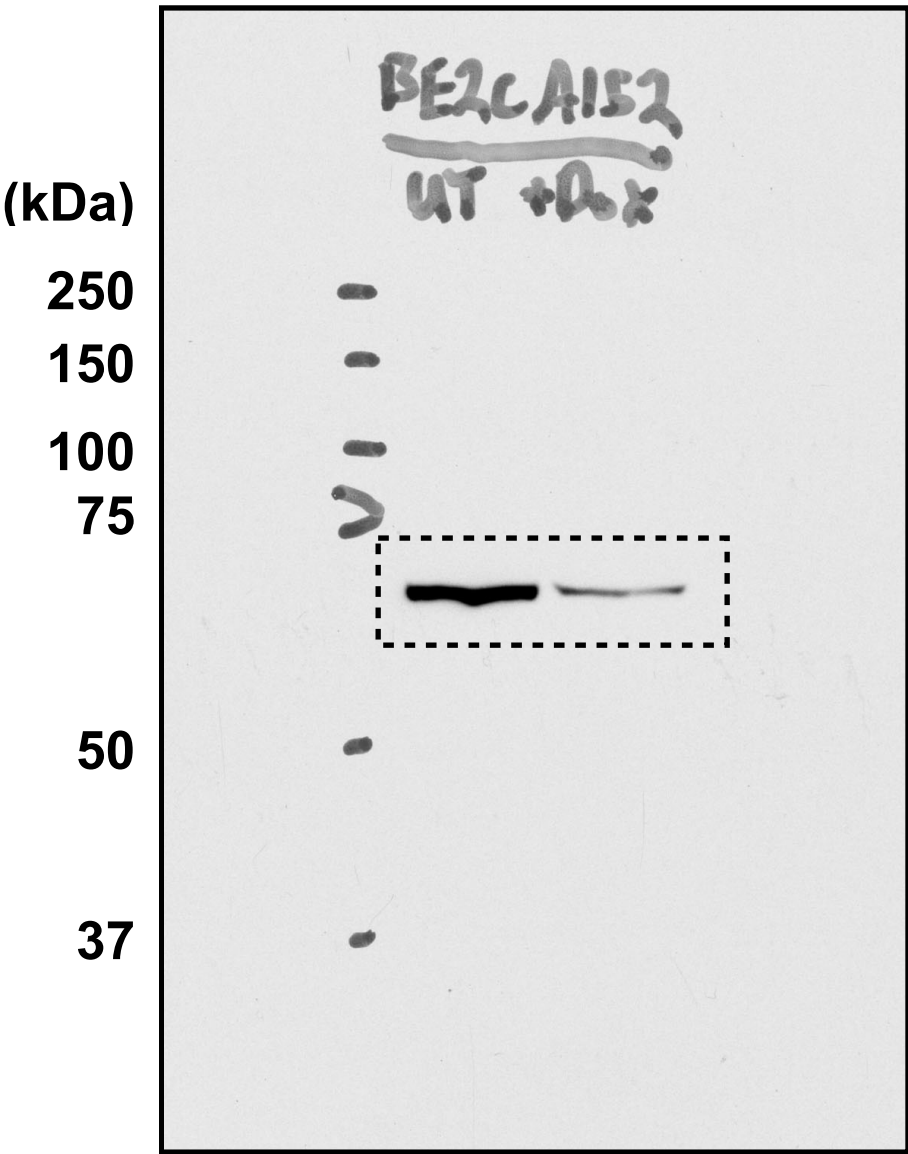

WB: CPSF6

Source data 2

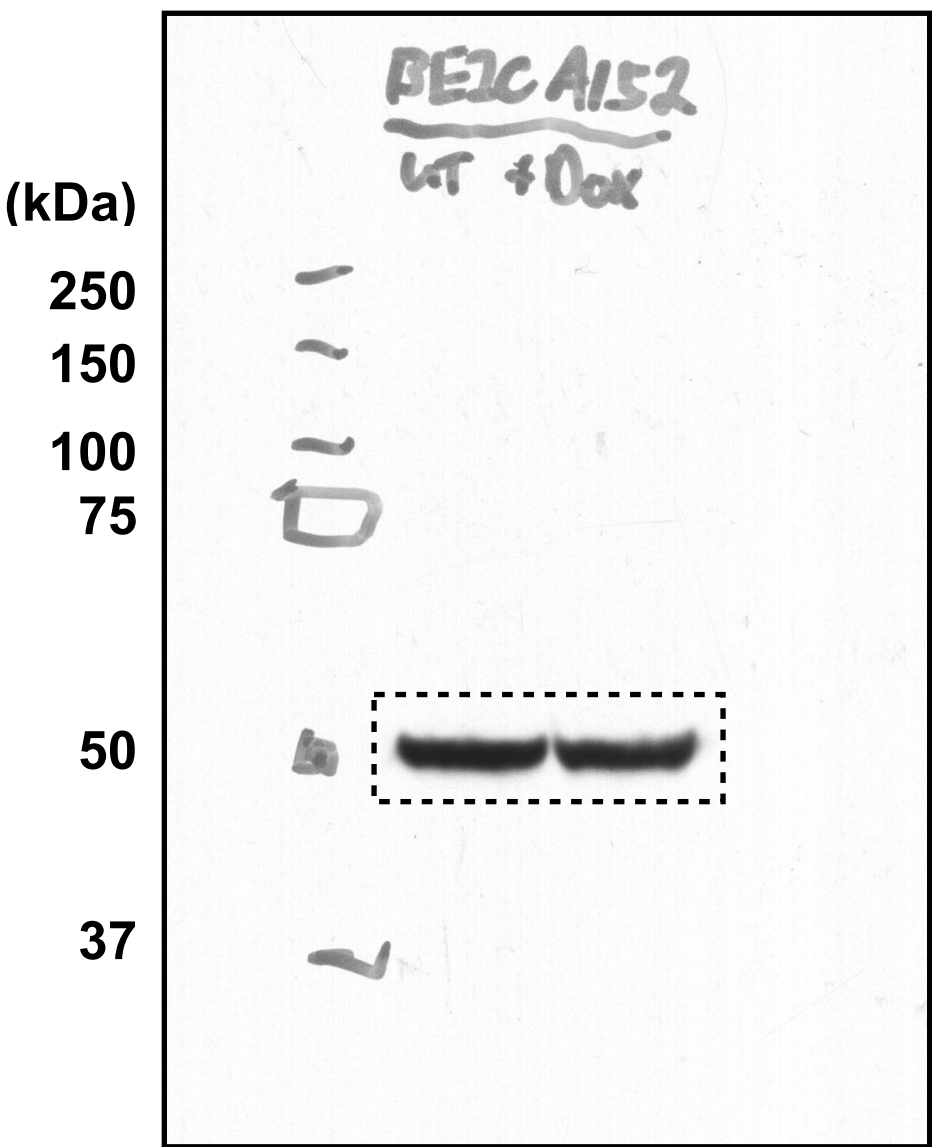

WB: Tubulin

Source data 3

Supplement: fig5-data1 [file elife-85036-fig5-data1-v1.zip]
